# Supplementary material for: What challenges did junior doctors face while working during the COVID-19 pandemic? A qualitative study
Source: PubMed Central journal article supplement (PMC8671849; doi:10.1136/bmjopen-2021-056122), 2021-12-13
Supplement: bmjopen-2021-056122.draft_revisions.pdf [file bmjopen-2021-056122.draft_revisions.pdf]

# BMJ Open

BMJ Open is committed to open peer review. As part of this commitment we make the peer review history of every article we publish publicly available.

When an article is published we post the peer reviewers' comments and the authors' responses online. We also post the versions of the paper that were used during peer review. These are the versions that the peer review comments apply to.

The versions of the paper that follow are the versions that were submitted during the peer review process. They are not the versions of record or the final published versions. They should not be cited or distributed as the published version of this manuscript.

BMJ Open is an open access journal and the full, final, typeset and author-corrected version of record of the manuscript is available on our site with no access controls, subscription charges or pay-per-view fees (<http://bmjopen.bmj.com>).

If you have any questions on BMJ Open's open peer review process please email [info.bmjopen@bmj.com](mailto:info.bmjopen@bmj.com)

# BMJ Open

## What challenges did junior doctors face whilst working during the COVID-19 pandemic? A qualitative study

|                               |                                                                                                                                                                                                                                                                                                                                                                                                                                                                                                                                                                                                                                                                                                                                                                                                                       |
|-------------------------------|-----------------------------------------------------------------------------------------------------------------------------------------------------------------------------------------------------------------------------------------------------------------------------------------------------------------------------------------------------------------------------------------------------------------------------------------------------------------------------------------------------------------------------------------------------------------------------------------------------------------------------------------------------------------------------------------------------------------------------------------------------------------------------------------------------------------------|
| Journal:                      | <i>BMJ Open</i>                                                                                                                                                                                                                                                                                                                                                                                                                                                                                                                                                                                                                                                                                                                                                                                                       |
| Manuscript ID                 | bmjopen-2021-056122                                                                                                                                                                                                                                                                                                                                                                                                                                                                                                                                                                                                                                                                                                                                                                                                   |
| Article Type:                 | Original research                                                                                                                                                                                                                                                                                                                                                                                                                                                                                                                                                                                                                                                                                                                                                                                                     |
| Date Submitted by the Author: | 12-Aug-2021                                                                                                                                                                                                                                                                                                                                                                                                                                                                                                                                                                                                                                                                                                                                                                                                           |
| Complete List of Authors:     | Spiers, Johanna; University of Birmingham, College of Medical and Dental Sciences<br>Buszewicz, Marta; University College London, Research Department of Primary Care and Population Health<br>Chew-Graham, Carolyn; University of Keele<br>Dunning, Alice; Bradford Teaching Hospitals NHS Foundation Trust<br>Taylor, Anna; University of Leeds<br>Gopfert, Anya; Torbay Council<br>Van Hove, Maria; University of Exeter<br>Teoh, Kevin; Birkbeck University of London, Department of Organizational Psychology<br>Appleby, Louis; University of Manchester, Psychiatry & Behavioral Sciences<br>Martin, James; University of Birmingham, Institute of Applied Health Research<br>Riley, Ruth; University of Birmingham Institute of Applied Health Research; University of Birmingham, of Applied Health Research |
| Keywords:                     | COVID-19, MENTAL HEALTH, Depression & mood disorders < PSYCHIATRY, QUALITATIVE RESEARCH                                                                                                                                                                                                                                                                                                                                                                                                                                                                                                                                                                                                                                                                                                                               |
|                               |                                                                                                                                                                                                                                                                                                                                                                                                                                                                                                                                                                                                                                                                                                                                                                                                                       |

SCHOLARONE™  
Manuscripts

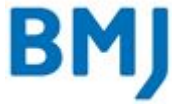

I, the Submitting Author has the right to grant and does grant on behalf of all authors of the Work (as defined in the below author licence), an exclusive licence and/or a non-exclusive licence for contributions from authors who are: i) UK Crown employees; ii) where BMJ has agreed a CC-BY licence shall apply, and/or iii) in accordance with the terms applicable for US Federal Government officers or employees acting as part of their official duties; on a worldwide, perpetual, irrevocable, royalty-free basis to BMJ Publishing Group Ltd ("BMJ") its licensees and where the relevant Journal is co-owned by BMJ to the co-owners of the Journal, to publish the Work in this journal and any other BMJ products and to exploit all rights, as set out in our [licence](#).

The Submitting Author accepts and understands that any supply made under these terms is made by BMJ to the Submitting Author unless you are acting as an employee on behalf of your employer or a postgraduate student of an affiliated institution which is paying any applicable article publishing charge ("APC") for Open Access articles. Where the Submitting Author wishes to make the Work available on an Open Access basis (and intends to pay the relevant APC), the terms of reuse of such Open Access shall be governed by a Creative Commons licence – details of these licences and which [Creative Commons](#) licence will apply to this Work are set out in our licence referred to above.

Other than as permitted in any relevant BMJ Author's Self Archiving Policies, I confirm this Work has not been accepted for publication elsewhere, is not being considered for publication elsewhere and does not duplicate material already published. I confirm all authors consent to publication of this Work and authorise the granting of this licence.

1  
2  
3  
4  
5  
6  
7  
8  
9  
10  
11  
12  
13  
14  
15  
16  
17  
18  
19  
20  
21  
22  
23  
24  
25  
26  
27  
28  
29  
30  
31  
32  
33  
34  
35  
36  
37  
38  
39  
40  
41  
42  
43  
44  
45  
46  
47  
48  
49  
50  
51  
52  
53  
54  
55  
56  
57  
58  
59  
60

# What challenges did junior doctors face whilst working during the COVID-19 pandemic? A qualitative study

**Johanna Spiers** (corresponding author)

Institute of Applied Health Research

University of Birmingham

Birmingham

United Kingdom

johanna.spiers@gmail.com

Tel: 07966 763 364

**Marta Buszewicz**

Research Department of Primary Care and Population Health

University College London Medical School

London

United Kingdom

**Carolyn A. Chew-Graham**

School of Medicine

Keele University

Keele

United Kingdom

**Alice Dunning**

Yorkshire Quality and Safety Research Group

Bradford Institute for Health research

Bradford Teaching Hospitals NHS Foundation Trust

Bradford

United Kingdom

**Anna K. Taylor**

Leeds Institute of Health Sciences  
Faculty of Medicine and Health  
University of Leeds  
Leeds  
United Kingdom

**Anya Gopfert**

Torbay Council,  
Torquay,  
TQ1 3DR

**Maria van Hove**

The University of Exeter,  
Exeter,  
EX4 4PY

**Kevin Rui-Han Teoh**

Department of Organizational Psychology  
Birkbeck, University of London  
London  
United Kingdom

**Louis Appleby**

Division of Psychology and Mental Health  
School of Medicine  
University of Manchester  
Manchester  
United Kingdom

**James Martin**

1  
2  
3 Institute of Applied Health Research  
4  
5 University of Birmingham  
6  
7 Birmingham  
8  
9 United Kingdom  
10

11  
12 **Ruth Riley**  
13

14 Institute of Applied Health Research  
15  
16 University of Birmingham  
17  
18 Birmingham  
19  
20 United Kingdom  
21

22  
23  
24  
25 Keywords: Junior doctors, COVID-19, Occupational Stress, Mental Health, Working  
26  
27 Conditions, Qualitative Methods  
28

29  
30  
31 Word count: 3760  
32  
33  
34  
35  
36  
37  
38  
39  
40  
41  
42  
43  
44  
45  
46  
47  
48  
49  
50  
51  
52  
53  
54  
55  
56  
57  
58  
59  
60

Consolidated criteria for reporting qualitative studies [COREQ]:

Developed from: Tong, A., Sainsbury, P., & Craig, J. [2007]. Consolidated criteria for reporting qualitative research [COREQ]: a 32-item checklist for interviews and focus groups. *International journal for quality in health care*, 19[6], 349-357.

| No. Item                                       | Guide questions/description                                                                                                                              | Reported on page # |
|------------------------------------------------|----------------------------------------------------------------------------------------------------------------------------------------------------------|--------------------|
| <b>Domain 1: Research team and reflexivity</b> |                                                                                                                                                          |                    |
| <i>Personal characteristics</i>                |                                                                                                                                                          |                    |
| 1. Interviewer/facilitator                     | Which author/s conducted the interview or focus group?                                                                                                   | Page 11            |
| 2. Credentials                                 | What were the researcher's credentials? E.g. PhD, MD.                                                                                                    | Page 11            |
| 3. Occupation                                  | What was their occupation at the time of the study?                                                                                                      | Page 11            |
| 4. Gender                                      | Was the researcher male or female?                                                                                                                       | Page 11            |
| 5. Experience and training                     | What experience or training did the researcher have?                                                                                                     | Page 11            |
| <i>Relationship with participants</i>          |                                                                                                                                                          |                    |
| 6. Relationship established                    | Was a relationship established prior to study commencement?                                                                                              | Page 11            |
| 7. Participant knowledge of interviewer        | What did the participant know about the researcher? E.g. personal goals, reasons for doing the research.                                                 | Page 11            |
| 8. Interviewer characteristics                 | What characteristics were reported about the interviewer/facilitator? E.g. bias, assumptions, reasons and interests in the research topic                | Page 12            |
| <b>Domain 2: study design</b>                  |                                                                                                                                                          |                    |
| <i>Theoretical framework</i>                   |                                                                                                                                                          |                    |
| 9. Methodological orientation and theory       | What methodological orientation was stated to underpin the study? E.g. grounded theory, discourse analysis, ethnography, phenomenology, content analysis | Page 12            |

|                                        |                                                                                    |                              |
|----------------------------------------|------------------------------------------------------------------------------------|------------------------------|
| <i>Participant sampling</i>            |                                                                                    |                              |
| 10. Sampling                           | How were participants selected? E.g. purposive, convenience, consecutive, snowball | Page 10                      |
| 11. Method of approach                 | How were participants approached? E.g. face-to-face, telephone, mail, email        | Page 10                      |
| 12. Sample size                        | How many participants were in the study?                                           | Page 11                      |
| 13. Non-participation                  | How many people refused to participate or dropped out? Reasons?                    | None                         |
| <i>Setting</i>                         |                                                                                    |                              |
| 14. Setting of data collection         | Where was the data collected? E.g. home, clinic, workplace                         | Page 11                      |
| 15. Presence of non-participants       | Was anyone else present besides the participants and the researchers?              | No                           |
| 16. Description of the sample          | What were the important characteristics of the sample? E.g. demographic data, date | Page 11                      |
| <i>Data collection</i>                 |                                                                                    |                              |
| 17. Interview guide                    | Were questions, prompts, guides provided by the authors? Was it pilot tested?      | Page 11                      |
| 18. Repeat interviews                  | Were repeat interviews carried out? If yes, how many?                              | No                           |
| 19. Audio/visual recording             | Did the research use audio or visual recording to collect the data?                | Page 11                      |
| 20. Field notes                        | Were field notes made during and/or after the interview or focus group?            | Page 11                      |
| 21. Duration                           | What was the duration of the interviews or focus group?                            | Page 11                      |
| 22. Data saturation                    | Was data saturation discussed?                                                     | Page 12                      |
| 23. Transcripts returned               | Were transcripts return to participants for comment and/or correction?             | No, due to lack of resources |
| <b>Domain 3: analysis and findings</b> |                                                                                    |                              |
| <i>Data analysis</i>                   |                                                                                    |                              |
| 24. Number of data coders              | How many data coders coded the data?                                               | Page 12                      |
| 25. Description of the coding tree     | Did authors provide a description of the coding tree?                              | No                           |
| 26. Derivation of themes               | Derived from the data?                                                             | Page 12                      |



|                                  |                                                                                                                                 |                              |
|----------------------------------|---------------------------------------------------------------------------------------------------------------------------------|------------------------------|
| 27. Software                     | What software, if applicable, was used to manage the data?                                                                      | Page 12                      |
| 28. Participant checking         | Did participants provide feedback on the findings?                                                                              | No, due to lack of resources |
| <i>Reporting</i>                 |                                                                                                                                 |                              |
| 29. Quotations presented         | Were participant quotations presented to illustrate the themes/findings? Was each quotation identified? E.g. participant number | Pages 13-22                  |
| 30. Data and findings consistent | Was there consistency between the data presented and the findings                                                               | Yes, see sages 13-22         |
| 31. Clarity of major themes      | Were major themes presented in the findings?                                                                                    | Yes                          |
| 32. Clarity of minor themes      | Is there a description of diverse cases or discussion of minor themes?                                                          | Yes                          |

# What challenges did junior doctors face whilst working during the COVID-19 pandemic? A qualitative study

## Abstract

**Objectives:** This paper reports findings exploring junior doctors' experiences of working during the COVID-19 pandemic in the UK.

**Design:** Qualitative study using in-depth interviews with 15 junior doctors. Interviews were audio-recorded, transcribed, anonymised and imported into NVivo 12 to facilitate data management. Data were analysed using reflexive thematic analysis.

**Setting:** NHS England.

**Participants:** A purposive sample of 12 female and three male junior doctors who indicated severe depression and/or anxiety on the DASS-21 questionnaire or high suicidality on Paykel's measure were recruited. These doctors self-identified as having lived experience of distress due to their working conditions.

**Results:** We report three major themes. Firstly, the challenges of working during the COVID-19 pandemic, which were both personal and organisational. Personal challenges were characterised by helplessness and included the trauma of seeing many patients dying, fears about safety and being powerless to switch off. Work-related challenges revolved around change and uncertainty, and included increasing workloads, decreasing staff numbers and negative impacts on relationships with colleagues and patients. The second theme was strategies for coping with the impact of COVID-19 on work, which were also both personal and organisational. Personal coping strategies were problem and emotion-focused, while several participants appeared to have moved from coping towards learned helplessness. Some organisations reacted to COVID-19 collaboratively and flexibly. Thirdly, participants reported a positive impact of the COVID-19 pandemic on working practices, which included

1  
2  
3 simplified new ways of working – such as consistent teams and longer rotations – as well as  
4 increased camaraderie and support.  
5  
6  
7

8  
9 Conclusions: Junior doctors described a variety of challenges whilst working during the  
10 pandemic. Coping strategies developed were both personal and organisational, and some  
11 changes in work were positive. We recommend that, post-pandemic, junior doctors are  
12 assigned to consistent teams and offered ongoing support.  
13  
14  
15  
16

### 17 18 Article summary: Strengths and limitations

- 19  
20  
21 • Participants were interviewed at the peak of the second wave of COVID-19 during  
22 the UK, meaning transcripts contain data that are highly relevant to the research  
23 question  
24
- 25  
26 • In-depth, reflexive thematic analysis was carried out on the data, leading to the  
27 development of rich, insightful themes  
28
- 29  
30 • Female participants outnumbered male participants in this study, potentially leading  
31 to gender imbalance  
32
- 33  
34 • Additionally, the wider study was not initially designed to explore experiences of  
35 working during COVID-19. Instead, participants naturally discussed this topic during  
36 interviews.  
37  
38  
39  
40

### 41 42 Funding statement

43  
44  
45 The study was funded by NIHR Research for Patient Benefit (grant number PB-PG-0418-  
46 20023). Please note that CCG is part-funded by West Midlands ARC.  
47  
48  
49

### 50 51 Competing interests

52  
53  
54 None  
55  
56  
57  
58  
59  
60

## Introduction

Doctors are more vulnerable to mental illnesses [such as anxiety and depression] and suicide than the general population [1, 2]. In recent years, including those before the COVID-19 pandemic, UK doctors have reported understaffing, stretched resources, increased workload and burnout [3-7].

There is an additional need to attend to frontline workers' wellbeing during health crises [6-8]. Frontline workers caring for COVID-19 patients have reported stress and distress due to the strain on healthcare systems [9]. Such stressors include the need for rapid training around treating a new illness [9] and the psychological impact of exposure to unprecedented levels of suffering and COVID-19-related deaths, both of patients and colleagues [8, 10, 11].

These stressors led to healthcare professionals (HCP) reporting fears about contracting or spreading the virus as well as uncertainty due to new ways of working [11, 12]. Impacts of these fears and stressors include reduced sleep, self-harm, panic attacks, guilt, relationship breakdowns [11], concerns about lack of training [7] and psychological trauma [10].

The UK reported some of the highest numbers of COVID-19 cases in Europe [7]. In a recent paper, almost half of the 224 UK doctors surveyed (from junior doctors to consultants) felt that their mental health had been harmed by the pandemic, while a third reported impacts to their physical health [5]. Increased healthcare worker burnout is, therefore, a major concern at this time. We need a holistic understanding of the experiences and needs of frontline workers to mitigate psychological distress and burnout [11].

'Junior doctor' is the term given to qualified doctors who are still in training whilst working. They may have eight or more years of experience, depending on their speciality [13]. Junior doctors have reported fears that they will 'fail' or appear 'weak' if they take time off sick [14], making it harder for them to report mental health concerns [14]. This group faced unique challenges during COVID-19 due to uncertainties about exams [6], potential redeployment [8, 15, 16] and concerns about their learning opportunities [15, 16]. UK junior

1  
2  
3 doctors have reported that they did not receive enough education before treating COVID-19  
4 patients [15]. They were also often faced with the difficult task of contacting patients'  
5 families to provide updates, since relatives were typically not permitted to visit [15].  
6  
7  
8  
9

10 Despite this, few researchers have looked in-depth at the psychological experiences of  
11 junior doctors. Instead, they have explored practical matters relating to this group, such as  
12 the resilience of new rotas (that is, assigning enough staff to cope with the workload) [17],  
13 redeployment [15, 16], the impact on training [18] and the provision of certain services such  
14 as obs and gynae [19].  
15  
16  
17  
18  
19

20  
21 Researchers have posited the need for more in-depth qualitative analysis in this area [5, 11].  
22 This paper is part of a wider study [20, 21] designed to explore the impact of working  
23 conditions and cultures on junior doctors in general. Data collection coincided with the  
24 second wave of the pandemic in the UK, meaning the topic naturally arose for all 15  
25 participants interviewed. As such, we aim to address this crucial gap in the literature and  
26 reflect the experiences of junior doctors working within the context of COVID-19.  
27  
28  
29  
30  
31  
32  
33

## 34 Method

### 35 Study design and setting

36 This qualitative study is part of a larger mixed-methods study exploring junior doctors'  
37 perceptions of stress and distress. Semi-structured interviews were used to explore junior  
38 doctors' experiences of working during COVID-19. The study setting was the NHS in England.  
39  
40  
41  
42  
43  
44  
45

### 46 Sampling and recruitment

47 A total of 456 junior doctors were initially recruited for an online survey exploring working  
48 cultures, psychological distress and suicidality between November 2020 and March 2021.  
49 They self-identified as participants, accessing the survey through posts on social media,  
50 junior doctor forums and via emails sent from their speciality schools. Survey participants  
51 whose results indicated severe depression and/or anxiety on the DASS-21 questionnaire  
52 [22] or high suicidality on Paykel's measure [23] were purposively contacted via email to ask  
53 if they would like to take part in an in-depth, qualitative survey. Interested individuals  
54  
55  
56  
57  
58  
59  
60

1  
2  
3 contacted JS and gave informed consent. Participants were given the chance to ask JS  
4 questions about the research team and the study before interviews went ahead. Fifteen  
5 junior doctors (12 female, three male) were recruited.  
6  
7  
8  
9

### 10 Data collection

11 A semi-structured interview guide was developed by the research team and modified  
12 iteratively as data collection and analysis progressed. This guide aimed to capture  
13 participants' views, experiences, feelings and beliefs about working conditions and cultures  
14 which were perceived as stressful or distressing. The guide was informed by the existing  
15 literature, input from junior doctors on the study team as well as patient and public  
16 involvement (PPI) consultation exercises conducted before obtaining funding. Following  
17 conventions for semi-structured interviews [24], points from the topic guide were followed  
18 up with individualised questions exploring topics of interest and importance for each  
19 participant.  
20  
21  
22  
23  
24  
25  
26  
27  
28  
29

30 Interviews were conducted either on the telephone or via video call, from participants'  
31 homes or places of work. They took place between December 2020 and February 2021 –  
32 that is, during the second wave of the COVID-19 pandemic in the UK – and at a date and  
33 time that were convenient to the participants. A risk protocol was used to ensure  
34 appropriate support was provided to participants in the event of the disclosure of suicidal  
35 ideation. The in-depth interviews were conducted by JS, a female PhD psychologist with  
36 extensive qualitative methods expertise. JS also recorded any pertinent observations in field  
37 notes following each interview. Interviews ranged from 29 minutes to 102 minutes in length  
38 (mean = 62.8 minutes).  
39  
40  
41  
42  
43  
44  
45  
46  
47  
48

49 The audio-recorded interviews were transcribed verbatim and checked for accuracy by JS  
50 before analysis. All transcripts were anonymised before discussion within the wider  
51 research team. Reflexive notes were recorded by researchers throughout the process.  
52  
53  
54  
55  
56  
57  
58  
59  
60

### Patient and public involvement and engagement

There are three junior doctors on the research team, all of whom consulted with other colleagues in the PPI team about the initial research idea and participated in analysis meetings. Five junior doctors gave feedback on the initial funding application, while four fed back on the protocol, topic guide and participant-facing documents.

### Data analysis

Data were analysed by JS using reflexive thematic analysis [25, 26]. An inductive, explicit, critical realist approach was adopted since this was in line with the researchers' desire for a rich, data-driven analysis. Data saturation is not a relevant concept within this type of approach, in which it is accepted that each new participant adds fresh insights. Analysis began once all interviews had been conducted. Transcripts were analysed one by one using NVivo 12. As analysis progressed, a table of themes was generated and refined. Each new transcript led to new codes and themes being added or expanded. In addition, four members of the team (RR, MB, AT, CCG) read and fed back on six of the 15 interviews. Their views and insights were collaboratively incorporated into the NVivo codes. JS then refined these codes to create relevant tables of themes once all interviews had been analysed and discussed. Analysis continued and deepened during the write-up, where shared meanings were generated and described for each theme [26].

### Reflexivity

RR, the study PI, is epistemological steeped in qualitative traditions underpinned by interpretivism, and phenomenology, and is oriented by critical theory such as feminism. With a background in psychology and sociology, and as a non-clinician, RR's interest in work cultures and conditions may also have been influenced by her experience of working as a researcher and medical educator, where she has observed rationalist and hegemonic cultures with an intolerance of vulnerability. Such orientations are likely to have influenced this topic and an interest in exploring why female doctors are more likely to experience distress.

1  
2  
3 JS, the lead analyst on this paper, is a qualitative health psychologist. She has an interest in  
4 in-depth, interpretative methods and so may have been influenced to see nuanced  
5 psychological interpretations of data. In addition, she is white, cis-gendered, heterosexual  
6 and able-bodied. This heteronormative positioning is likely to have impacted her  
7 interviewing and analysis.  
8  
9  
10  
11  
12

### 13 Findings

14 All fifteen participants discussed the impact of COVID-19 on their working conditions.  
15 Findings divided into three major themes: Challenges of working during the COVID-19  
16 pandemic; Strategies for coping with the impact of COVID-19 on work; Positive impact of  
17 the COVID-19 pandemic on working practices.  
18  
19  
20  
21  
22  
23  
24

25 See Table One for an overview of all relevant themes and subthemes.  
26  
27  
28  
29  
30  
31  
32  
33  
34  
35  
36  
37  
38  
39  
40  
41  
42  
43  
44  
45  
46  
47  
48  
49  
50  
51  
52  
53  
54  
55  
56  
57  
58  
59  
60



| Theme                                                                                                                                                                                    | Subtheme                           |
|------------------------------------------------------------------------------------------------------------------------------------------------------------------------------------------|------------------------------------|
| Challenges of working during the Covid-19 pandemic<br><i>"patients were just dying in front of us so quickly and they were young" (P5)</i>                                               | Personal impact                    |
|                                                                                                                                                                                          | Work-related impact                |
| Strategies for coping with the impact of Covid-19 on work<br><i>"So although I should have moved on from GP I ended up staying in GP so I was actually there for eight months." (P7)</i> | Personal strategies                |
|                                                                                                                                                                                          | Organisational strategies          |
| Positive impact of Covid-19 on working practices<br><i>"since COVID, things have improved slightly there's, um we have something called like the rest and recuperation hub." (P6)</i>    | Positive new ways of working       |
|                                                                                                                                                                                          | Additional support and camaraderie |

**Table one: Table of themes for junior doctors' experience of working during the Covid-19 pandemic**

### Challenges of working during the COVID-19 pandemic

Participants described challenges related to their work as junior doctors during the COVID-19 pandemic. Challenges were personal or work-related.

#### *Personal impact*

Working as junior doctors during the COVID-19 pandemic affected participants' mental health. Throughout this theme, there is a sense that participants felt helpless and powerless as they strove to carry out their jobs in such unmapped territories.

P5 described the harmful impact of being exposed to death and suffering:

*I'd seen [pause] a whole ward just emptied out and then refilled overnight, after people had just died. It was horrendous. Uh, I was like, "I need to talk to somebody about this or I'm just going to go home and cry". (P5, female)*

Participants felt helpless in the face of fears for their own safety and that of their loved ones. Initially, they were unsure of how to protect themselves or of the risk they might pose to their families:

*...we had someone that we thought was, um, COVID, but it was very, very early on. And I remember being told off for wearing a mask. (P3, female)*

*...we were worried about if we were taking home our clothes, if we were making other people sick, if we would get sick, it was an incredibly stressful working environment. (P5, female)*

As time went on, fears for personal safety came from different sources, with P10 reporting that her colleagues were not maintaining safety standards. However, as a junior doctor, she felt powerless to ask for this to change:

*It's not patients, it's staff. I find that really stressful. Like you walk past an office and there might be two or three people sat in an office having a chat, all with their masks*

1  
2  
3 *under their chin. [...] I don't feel confident enough to knock on the window and be like*  
4 *guys, what are you doing? But I know that them doing it puts me more at risk and puts*  
5 *the patients at risk. [...] You see stuff being wrong and you're like every day, like*  
6 *multiple times a day you're like do I say something, do I not say something? And you*  
7 *feel bad for not saying something. (P10, female)*  
8  
9  
10  
11  
12  
13

14 P10's description of this discomfort could be defined as moral injury; that is, the distress  
15 that occurs when a person witnesses or carries out an act that is contrary to their values.  
16  
17

18  
19 Participants were powerless to switch off or rest when they got home from work:  
20  
21

22  
23 *You couldn't switch off, you never felt like you'd had, uh, done a good job. (P5, female)*  
24  
25

26  
27 *...my sleep is awful again, I'm waking up, I think COVID hasn't helped with these sort of*  
28 *flashbacks. (P1, female)*  
29  
30

31  
32 Participants did not feel clinically supported in the new working environment caused by  
33 COVID-19, which led to further powerlessness and stress. The lack of support was both  
34 educational:  
35  
36  
37

38  
39  
40 *I'm going to personally take responsibility for changing [...] the big scary machine that*  
41 *I'm not trained in, and, uh, figure out how it works, whilst the patient is there trying to*  
42 *physically die in front of me, but so are five others, so oh well, no help is coming. (P5,*  
43 *female)*  
44  
45  
46  
47

48  
49 And psychological:  
50  
51

52  
53 *...they got some psychologists who would be available and very occasionally they*  
54 *would come on the ward. [pause] And they would talk to the nurses. And that was it.*  
55 *No. It felt assumed to be on the nurses and people working in ITU and just ordinary*  
56 *junior doctors didn't [pause] didn't seem to matter. (P14, female)*  
57  
58  
59  
60

1  
2  
3 Perceived poor communication meant that participants felt unsupported in various ways.

4  
5 One felt her safety was compromised:

6  
7  
8  
9 *...you will turn up on a ward and you will find out halfway through handover that*  
10 *they've had a positive case over the weekend. (P10, female)*  
11  
12

13  
14 Additionally, a junior doctor whose family were overseas reported feeling unsupported by  
15 her hospital after contracting COVID-19:

16  
17  
18  
19 *...when I went to quarantine, I realised that no-one actually cares about you from the*  
20 *hospital? [...] No-one called me! [...] When I was very very sick, imagine that, if I had, if*  
21 *I had literally no-one. (P4, female)*  
22  
23  
24

### 25 26 27 *Work-related impact* 28

29  
30 The work-related impact of working during a COVID-19 context centred around uncertainty  
31 and change. These included changes to workload, staffing levels, relationships with  
32 colleagues and patients, lack of support and uncertainty around new ways of working.  
33  
34  
35

36  
37  
38 Workload changed by growing when COVID-19 hit, leading to further stressors.

39  
40  
41  
42 *...on a Friday in the middle of the day when there was no consultant around [...] I*  
43 *gained 14 new patients who I'd not met before [...] that was a really stressful day. (P6,*  
44 *female)*  
45  
46  
47

48  
49 Workload increased out of hours as well, as participants had to learn about the virus:

50  
51  
52  
53 *So we were getting 20 emails a day, and every single one would have a red flag saying*  
54 *"vital, important, must read", and you'd worry you'd missed something [...] there's so*  
55 *much information, it was constant, and you couldn't switch off, because it would*  
56 *impact your job. (P5, female)*  
57  
58  
59  
60

1  
2  
3 As workload rose, staffing levels, which had already been stretched, changed by reducing  
4 further due to staff illness or the need to self-isolate:  
5  
6  
7

8 *So it's very very short-staffed because a lot of the people are self-isolating, ill with*  
9 *COVID, or just because you know they've worked already five or six days in a row, and*  
10 *obviously they're quite tired and they have to take a break. (P12, male)*  
11  
12  
13  
14

15  
16 The additional workload changed working relationships in various ways. Participants  
17 reported that colleagues became irritable or verbally aggressive due to increased stress:  
18  
19

20  
21 *I think everyone got a little bit more [pause], um, maybe snippy? With each other?*  
22 *'Cause we were all are very stressed and anxious. (P3, female)*  
23  
24

25  
26  
27 *...a registrar wearing an MF53 mask<sup>1</sup> and the consultant laying into him basically*  
28 *shouting at him that [...] he was depriving someone else who actually needed this*  
29 *mask [...] emotions were running high because people were scared. (P14, female)*  
30  
31  
32

33  
34 One trainee, based in general practice, reported that patients had become abusive during  
35 telephone appointments:  
36  
37

38  
39 *...sometimes people lose sense of the fact that it's another human being on the end of*  
40 *the phone with them. (P7, female)*  
41  
42  
43

44  
45 That participant also reported finding the change to telephone appointments clinically  
46 challenging:  
47  
48

49  
50 *I don't think you realise how much you rely on seeing someone in front of you to know*  
51 *how well they are. And talking to someone over the phone it just feels a lot more*  
52 *dangerous. (P7, female)*  
53  
54  
55  
56  
57  
58

59  
60  

---

<sup>1</sup> This is a full face, military style of mask

1  
2  
3 Compounding these conflicts was the fact that it became harder to speak with and get  
4 support from peers due to the safety measures:  
5  
6  
7

8 *Um, and now with COVID where you're only allowed, like, two people in each room, it,*  
9 *it's very difficult to, um, socialise and talk. (P8, female)*  
10  
11  
12

13  
14 Participants also found the uncertainty around changes to rotas and exams challenging:  
15  
16  
17

18 *...a fair amount of uncertainty and the problem this time is that, ah, a lot of courses*  
19 *are still going ahead, exams are still going ahead, but we've been moved onto*  
20 *emergency rotas with a week's notice. (P8, female)*  
21  
22  
23

24  
25 Anxiety due to uncertainty about redeployment was reported:  
26  
27  
28

29 *...quite anxious and uncertain about whether that was going to happen*  
30 *and would sort of check my emails pretty consistently to see whether that*  
31 *was actually whether that was going to be um delayed or stopped because*  
32 *of COVID redeployment. (P6, female)*  
33  
34  
35  
36  
37  
38

39 The pandemic meant that new ways of working were quickly developed and implemented.  
40 Trying to adjust to these changes was another challenge. One trainee in psychiatry talked  
41 about the challenges of working from home:  
42  
43  
44  
45

46 *...you've not got those people around you to bounce things off, so you might get an*  
47 *email and it might be quite an anxiety-inducing email because it might say someone's*  
48 *suicidal, you need to see them, and you're thinking, oh, I can't see them, erm, and*  
49 *normally, kind of in an office you'd just be able to ask, can anyone else see them? (P2,*  
50 *female)*  
51  
52  
53  
54  
55  
56  
57

58 [Strategies for coping with the impact of COVID-19 on work](#)  
59  
60

1  
2  
3 Participants described both personal and organisational strategies for coping with the above  
4 challenges.  
5  
6  
7  
8

### 9 *Personal coping strategies*

10  
11  
12  
13 Problem-focused and emotion-focused coping strategies were utilised for dealing with the  
14 challenges of COVID-19. Problem-based, or practical, coping strategies included seeking  
15 professional therapy:  
16  
17

18  
19  
20  
21 *...when lockdown came back in [...] I noticed that like I was feeling low so I referred*  
22 *myself to the Let's Talk Wellbeing, erm which is like the community, CBT, GP, self-*  
23 *referral system. And I found that really helpful erm so that kind of stopped me*  
24 *spiralling. (P10, female)*  
25  
26  
27  
28

29  
30 Another participant volunteered to take on the work of calling relatives to let them know  
31 their loved ones were very sick, perhaps to regain some control:  
32  
33

34  
35  
36 *I used to volunteer to kind of be the person making those phone calls, cos it was, it felt*  
37 *like you were able to do something about it at least? It wasn't that sort of like, "I put*  
38 *lines in people and hopefully", and then just watching them die. (P5, female)*  
39  
40  
41  
42

43 Emotion-based coping strategies included crying:  
44  
45

46  
47 *So I cried a lot outside. Because it was getting warmer so you could go outside. Hug a*  
48 *tree, cry. (P14, female)*  
49  
50

51 And stoicism, although this latter strategy suggested a sense of resignation:  
52  
53

54  
55  
56 *And [pause] and in a way it didn't really matter that our rota changed,*  
57 *because there was nothing else to do? (P8, female)*  
58  
59  
60

1  
2  
3  
4  
5 Or perhaps even learned helplessness in the face of such trauma:  
6  
7

8  
9 *I think erm you know everyone's a bit more sort of resigned to things now and it feels*  
10 *like we've sort of erm entered a collective sort of depressive state of acceptance. (P9,*  
11 *male)*  
12  
13  
14

### 15 16 *Organisational strategies*

17  
18  
19  
20 Just as participants found ways to cope with the challenges of COVID-19, so did the  
21 organisations and teams for whom they worked, with some trusts and teams demonstrating  
22 collaborative, flexible thinking. One participant reported flexibility for colleagues who had to  
23 self-isolate:  
24  
25  
26  
27

28  
29  
30 *...most of the places have let the person sort of choose whether they you know, if it's*  
31 *your child that's got a fever and actually you know you're isolating and could do things*  
32 *then that's fine. But if you're poorly then you're poorly and that's fine. (P11, female)*  
33  
34  
35

36  
37 P14 described the need for her team to make pragmatic decisions about how to treat  
38 COVID-19 patients:  
39  
40

41  
42  
43 *So if someone was clearly dying, they would [pause] be stepped down to a normal*  
44 *ward because on a normal ward they could at least have a visitor for one hour a day.*  
45 *(P14, female)*  
46  
47  
48

49  
50 P5 reported that her team pulled together to help one another in the new circumstances:  
51  
52

53  
54 *...there'd be so many [emails] even coming in during our shift, we'd divide it up, so*  
55 *we'd say, "you read these five, I'll read these five, you read these five, and then I'll read*  
56 *these five", and then we'd kind of share what we've learned from them. (P5, female)*  
57  
58  
59  
60



### Positive impact of COVID-19 on working practices

Participants reported that working as junior doctors during the COVID-19 pandemic had some positive impacts. These were new ways of working as well as additional support and camaraderie.

#### *Positive new ways of working*

These positive changes appeared to revolve around a simplified way of working, which included consistent teams, longer rotations and less red tape.

Several participants reported that they were now working in a consistent team, rather than regularly working with new colleagues. This was experienced as positive:

*So normally, you're kind of working with somebody new every day almost. But we worked in teams that didn't rotate, so you had [...] this team that you worked with very intensely for those four months as well, and that support structure was really good. (P5, female)*

*...we got really to know each other, we had a little social WhatsApp group where we'd, like, post pictures of the cakes we were gonna bring in, you know, everyone bought in food. We almost looked forward to going to work because you were like, oh, my buddies are there. (P8, female)*

Rotations were paused for many junior doctors. Although this could lead to uncertainty, as reported in the previous theme, it also had some positive impacts:

*So we were on the first rotation for four months and then the second for eight months [...] Um, so, I guess it would have depended on what ward you got stuck on? [interviewer laughs] Um, I got stuck on one of the nice placements, I really enjoyed myself on the ward. (P3, female)*

1  
2  
3  
4  
5 Various practical changes to working patterns were also experienced as positive. These  
6 included the ability to work from home and reduced red tape:  
7  
8  
9

10 *...just get away and do something relaxing, even if it's just go for a walk around the*  
11 *local canal and come back on a lunchtime is so much more achievable when you're*  
12 *working from home. So I think that's been really good. (P2, female)*  
13  
14  
15  
16

17 *...they say oh, we want you to travel to a hospital on your day off to show us your*  
18 *passport and your GMC certificate. And it's like I've been – doing this for 10 years. I've*  
19 *worked for you six times! Like, you've got my details [both laugh]. And that's one thing*  
20 *where COVID has been really good because now they do it online and I'm like, why*  
21 *couldn't you have always done this? (P8, female)*  
22  
23  
24  
25  
26  
27

28  
29 One participant even appeared to cite COVID-19 as a motivator for returning to work at the  
30 NHS after time in another career:  
31  
32

33 *...then COVID came and I wanted to come back to medicine anyway so I thought okay*  
34 *fine then let's just crack on with erm with the NHS. (P15, female)*  
35  
36  
37  
38  
39  
40

#### 41 *Additional support and camaraderie*

42  
43  
44

45 Some participants reported that new supportive measures had been put in place by their  
46 workplaces:  
47  
48  
49

50 *And since COVID, things have improved slightly, there's, um we have something called*  
51 *like the rest and recuperation hub, which is like a room erm that does free teas and*  
52 *coffees and a few snacks [...] you go there on your breaks to relax. (P6, female)*  
53  
54  
55  
56  
57

58 P1 reported that her hospital made an effort to offer junior doctors support, although this  
59 was against the backdrop of a toxic working environment:  
60

1  
2  
3  
4  
5 *I'd say the culture's getting worse except for the fact that they send an e-mail out*  
6 *every now and again with some contact numbers and that's what COVID has done.*  
7  
8 *(P1, female)*  
9

10  
11  
12 It should be noted that the reports of improved support were tempered – note that  
13 participants reported 'slight' improvements to a culture that was also 'getting worse'.  
14  
15

16  
17  
18 One participant stated that her hospital offered practical support in the form of food during  
19 the first wave of the virus:  
20

21  
22  
23 *...they provided hot meals, which, at the beginning, when there were huge queues at*  
24 *the supermarket, and we were working 12-hour shifts, five days a week, and, um,*  
25 *[pause] and it was unpredictable whether you could kind of get food, because there*  
26 *were a lot of shortages and things. (P5, female)*  
27  
28  
29  
30  
31

## 32 Discussion

33

34  
35  
36 Fifteen junior doctors were interviewed between December 2020 and February 2021 about  
37 their perceptions of stress and distress in their workplace cultures. All participants discussed  
38 how COVID-19 impacted their experiences. Three major themes were generated: Challenges  
39 of working during the COVID-19 pandemic; Strategies for coping with the impact of COVID-  
40 19 on work; Positive impact of the COVID-19 pandemic on working practices. These will now  
41 be discussed in the light of existing literature.  
42  
43  
44  
45  
46  
47

48  
49 Participants reported that working during COVID-19 resulted in feelings of sadness, moral  
50 injury, being out of control and unsupported. Similarly, previous researchers have reported  
51 fear, anxiety, depression, exhaustion and burnout amongst frontline workers at this time [8,  
52 9, 11, 16].  
53  
54  
55

56  
57  
58 One participant described how hard it was to see so many patients dying. Others [8, 10, 27]  
59 have cited grief and managing death as especially challenging. We suggest that newer junior  
60

1  
2  
3 doctors might need extra support to process grief given their relative lack of exposure to  
4 death.  
5  
6  
7

8 Participants also described existential fears about their safety and that of their loved ones.  
9 Such fears have frequently been reported during this time [6, 10, 15], with some HCP living  
10 away from home to protect their families during COVID-19 [11].  
11  
12  
13  
14

15  
16 One participant reported an experience of moral injury in the context of her safety concerns  
17 regarding staff behaviour. Moral injury due to redeployment away from long-term patients  
18 [15] or concerns about letting patients down [8] during COVID-19 has been reported. Our  
19 findings add another layer, demonstrating that moral injury can also arise due to staff  
20 members neglecting safety protocols. Newman et al. [11] recommended support for moral  
21 injury during this time.  
22  
23  
24  
25  
26  
27

28  
29 Participants felt unsupported whilst working in these new circumstances, a finding reflected  
30 elsewhere [7, 10, 11]. The need for extra training and support for junior doctors during the  
31 pandemic has been reported [15]. We echo this recommendation, suggesting that support  
32 can come from good leadership and a feeling of being valued within a team.  
33  
34  
35  
36  
37

38 Participants reported that while their workload rose due to the pandemic, staffing levels  
39 decreased. Previous research has shown that UK HCP are already working in an under-  
40 resourced environment and that workload is a stressor [21, 28-30]. Crises such as COVID-19  
41 highlight the need for extra resources for our healthcare system, echoing the  
42 recommendations of the 2009 Boorman report [31], which have been widely neglected [6].  
43 Additionally, it is harder for frontline workers to take breaks during a pandemic [5, 10],  
44 adding to the potential for burnout since longer working hours are a risk factor [32]. These  
45 stressors also impacted relationships with both colleagues and patients [8].  
46  
47  
48  
49  
50  
51  
52  
53

54 Participants in the current study, like others [7, 10, 11], felt unsupported during this time.  
55 Some HCPs have refused or were reluctant to take on roles for which they did not feel  
56 qualified [8, 11, 16], whilst others did this work despite feeling unsupported [9, 16].  
57  
58  
59  
60

1  
2  
3 Cubitt and colleagues [5] have highlighted the need for rotas that enable well-being rather  
4 than merely being resilient. Qualitative research such as the current study adds depth to  
5 these recommendations by demonstrating the instability and overwork HCP face.  
6  
7  
8  
9

10 Participants used problem-focused coping strategies such as attending therapy or  
11 volunteering for certain roles to cope during COVID-19. Chinese nurses have reported  
12 volunteering for extra duties [9], demonstrating dedication despite the challenges. Emotion-  
13 focused strategies such as crying were reported in our study, whilst humour, rationalisation  
14 and distraction [9] as well as meditation and time with friends [11] have been reported  
15 elsewhere. Participants in the current study also reported stoicism which verged on learned  
16 helplessness, demonstrating that personal coping strategies alone are not enough. Junior  
17 doctors need organisational support especially, although not exclusively, during crises like  
18 COVID-19. However, the emphasis continues to be on individual rather than organisational  
19 interventions and coping strategies [33, 34].  
20  
21  
22  
23  
24  
25  
26  
27  
28  
29

30 Various individualised coping strategies have been suggested in the literature from the UK,  
31 including healthy eating, attending training, going to therapy, support networks [6] and  
32 'wobble rooms' [15]. However, San Juan and colleagues [6] recognised that finding time for  
33 these activities might be difficult. Indeed, it could be posited that encouraging such  
34 strategies places the responsibility for managing an unmanageable system with individuals,  
35 rather than the systems themselves [6], despite COVID-19 having compounded existing  
36 stressors, severe workforce shortages and burnout [35]. It is argued that, in our neo-liberal  
37 culture, responsibility for wellbeing is often placed on the individual, exonerating the state  
38 and systems for the wellbeing of workers [36, 37]. Therefore, in line with San Juan et al. [6],  
39 we recommend a focus on organisational coping strategies.  
40  
41  
42  
43  
44  
45  
46  
47  
48  
49

50 Participants reported that their teams responded to COVID-19 flexibly, making pragmatic  
51 decisions about patient care and working as a team. San Juan and colleagues [6]  
52 recommended leadership, communication, peer support and flexibility as organisational  
53 tools which could be used to help during a pandemic. Improved communications were also  
54 emphasised by Coughlan et al. [15]. Given the observation that poor communications during  
55 COVID-19 increased stress levels, this appears to be an important area.  
56  
57  
58  
59  
60

1  
2  
3  
4  
5 Participants reported several potentially positive impacts of working during the pandemic.  
6  
7 These included working in more consistent teams. San Juan and colleagues [6] have similarly  
8  
9 reported that consistent teams are helpful for HCP, while inconsistent teams make it harder  
10  
11 for junior doctors to seek support [14], increasing stress and vulnerability to mental ill-  
12  
13 health [21]. As such, we recommend that, where possible, policymakers consider the use of  
14  
15 consistent teams for junior doctors going forward.  
16

17  
18 While both benefits and disadvantages of working from home were reported in our study,  
19  
20 disadvantages have been reported elsewhere, especially for HCP with young children or  
21  
22 work that includes confidential and sensitive meetings [8]. The reduction in red tape  
23  
24 reported by one participant appears to be a novel finding. We would suggest that any such  
25  
26 reductions should be maintained after the pandemic ends, as this will reduce time pressures  
27  
28 for junior – and senior – doctors.  
29

30  
31 Participants stated that new supportive measures, such as ‘wobble rooms’ had been put  
32  
33 into place during COVID-19. Such spaces have been deemed helpful by other researchers [7,  
34  
35 10, 15], although there are anecdotal reports that many of these spaces have now been  
36  
37 closed as hospitalisations from COVID-19 reduce. In contrast, some HCP reported that,  
38  
39 rather than being provided with ‘wobble rooms’, the extra strain on the system meant that  
40  
41 there were fewer places than usual to shower, rest or relax with colleagues [5, 6].  
42

43  
44 In line with our findings, Vindrola-Padros et al. [7] reported that there was extra signposting  
45  
46 towards support during COVID-19; however, there was not often time to engage with this  
47  
48 support. Additionally, it has been anecdotally reported that much of this support has been  
49  
50 withdrawn now. This adds further weight to the notion that systemic, holistic changes are  
51  
52 needed to support NHS staff, rather than individual ones [6].  
53

## 54 55 Limitations

56  
57 This study has various strengths, including being the first qualitative paper (to our  
58  
59 knowledge) to explore the experiences of junior doctors during COVID-19. Our data was  
60

1  
2  
3 collected during the pandemic and we utilised in-depth, collaborative thematic analysis.  
4  
5 However, despite these strengths, the paper has several limitations. We did not recruit  
6  
7 these participants specifically to talk about the Covid-19 pandemic. Rather, the timing of the  
8  
9 study meant that the topic arose naturally. As such, the interview guide could have been  
10  
11 designed to ask participants more thoroughly about these experiences. Additionally, some  
12  
13 of the junior doctors had more experience of working with COVID-19 patients than others,  
14  
15 meaning some participants are better represented in this paper than others. Further, there  
16  
17 is a notable gender disparity, with a higher proportion of female doctors taking part. More  
18  
19 female (n=12) participants volunteered than males (n=3). The increased willingness of  
20  
21 female participants to speak about their experiences may reflect evidence indicating that  
22  
23 female doctors are more likely to experience distress and end their lives [1]. The higher  
24  
25 proportion of female participants may also reflect gendered help-seeking behaviour for  
26  
27 mental ill-health, evidenced in the wider population [38], as well as the fact that female  
28  
29 doctors are more likely to take part in research than their male counterparts [39].  
30

### 31 Conclusions and recommendations

32  
33 We conclude that junior doctors working during the COVID-19 pandemic faced multiple  
34  
35 stressors and used various coping mechanisms to deal with these, with greater or lesser  
36  
37 degrees of success. Several unexpected benefits of this period arose, including new ways of  
38  
39 working and additional support and camaraderie. We believe that the responsibility for  
40  
41 alleviating the stress and distress of junior doctors working during times of stress lies with  
42  
43 systems of employment and systemic workforce gaps, rather than with individuals. As such,  
44  
45 we recommend holistic, system-wide changes such as better communication strategies,  
46  
47 increased flexibility around home-based working and other logistical issues as well as  
48  
49 stronger, more compassionate leadership going forward. Additionally, we suggest that,  
50  
51 where possible, junior doctors are assigned to consistent teams and offered fuller  
52  
53 psychological support.  
54

55 **Author contributions:** RR, JS, CCG, MB, AD, KT, AG, AT, MvH, LA, JM – substantial  
56  
57 contributions to conception and design; approval of final version to the published.  
58  
59  
60

1  
2  
3 RR, JS, CCG, MB, AT, KT, AD, AT – acquisition, analysis or interpretation of data; drafting the  
4 article or revising it critically for important intellectual content.  
5  
6  
7

8  
9 **Acknowledgements:** The authors would like to thank all junior doctor participants who  
10 kindly gave their time to share their experiences of working in the NHS. We also wish to  
11 thank members of the PPIE group who provided valuable input throughout the study.  
12  
13  
14

15  
16 **Data sharing:** This study has not received ethical approval to share confidential data with  
17 any third party other than the research team.  
18  
19

20  
21 **Ethical approval:** Ethical approval was granted by the University of Birmingham and Health  
22 Research Authority (reference number: 19/HRA/6579)  
23  
24  
25  
26  
27  
28  
29  
30  
31  
32  
33  
34  
35  
36  
37  
38  
39  
40  
41  
42  
43  
44  
45  
46  
47  
48  
49  
50  
51  
52  
53  
54  
55  
56  
57  
58  
59  
60



## References

1. Dutheil, F., et al. *Suicide among physicians and health-care workers: A systematic review and meta-analysis*. PloS one. 2019. **14**(12): p. e0226361
2. Petrie, K., et al. *Interventions to reduce symptoms of common mental disorders and suicidal ideation in physicians: A systematic review and meta-analysis*. The Lancet Psychiatry. 2019. **6**(3): 225-34.
3. Brooks, S. K., et al. *Review of literature on the mental health of doctors: Are specialist services needed?* Journal of Mental Health. 2011. **20**(2): 146-56.
4. Chopra, S. S. et al. *Physician Burnout*. JAMA. 2004. **291**(5): 633–33.
5. Cubitt, L. J. et al. *Beyond PPE: A mixed qualitative-quantitative study capturing the wider issues affecting doctors' well-being during the COVID-19 pandemic*. BMJ Open. 2021. **11**(3): e050223.
6. San Juan, N. V., et al. *Healthcare Workers' mental health and wellbeing during the COVID-19 pandemic in the UK: Contrasting guidelines with experiences in practice*. MedRxiv. 2020; advanced online.
7. Vindrola-Padros C., et al. *Perceptions and experiences of healthcare workers during the COVID-19 pandemic in the UK*. BMJ Open. 2020; **10**(11): Advanced online: e040503.
8. Liberati E., et al. *A qualitative study of experiences of NHS mental healthcare workers during the Covid-19 pandemic*. BMC Psychiatry. 2021. **21**(1): 1-12.
9. Sun, N., et al. *A qualitative study on the psychological experience of caregivers of COVID-19 patients*. American Journal of Infection Control. 2020. **48**(6): 592-8.
10. Blake, H., et al. *COVID-well study: Qualitative evaluation of supported wellbeing centres and psychological first aid for healthcare workers during the COVID-19 pandemic*. International Journal of Environmental Research and Public Health. 2021. **18**(7): 3626-59.
11. Newman K. L., et al. *Experiences and emotional strain of NHS frontline workers during the peak of the COVID-19 pandemic*. International Journal of Social Psychiatry. 2021; advanced online 00207640211006153.
12. Cawcutt K. A., et al. *Fighting fear in healthcare workers during the COVID-19 pandemic*. Infection Control & Hospital Epidemiology. 2020. **41**(10): 1192-3.
13. BMA, <https://www.bma.org.uk/advice-and-support/international-doctors/life-and-work-in-the-uk/toolkit-for-doctors-new-to-the-uk/doctors-titles-explained>. 2020.

14. Fox F. E., et al. *Junior doctors' experiences of personal illness: A qualitative study*. Medical Education. 2011. **45**(12): 1251-61.
15. Coughlan C., et al. *COVID-19: Lessons for junior doctors redeployed to critical care*. Postgraduate Medical Journal. 2021. **97**(1145): 188-91.
16. Lion P., et al. *ENT trainees' experience of redeployment during the coronavirus disease 2019 pandemic: A qualitative study*. The Journal of Laryngology & Otology, 2021. 1-13.
17. Aziz, A., et al. *Rapid transformation of the medical on-call rotas to deal with the COVID-19 pandemic: A case study*. Future Healthcare Journal. 2021; **8**(1): e36.
18. Seifman M. A., et al. *COVID-19 impact on junior doctor education and training: A scoping review*. Postgraduate medical journal. 2021.
19. Rimmer, M. P., et al. *Provision of obstetrics and gynaecology services during the COVID-19 pandemic: A survey of junior doctors in the UK National Health Service*. BJOG: An International Journal of Obstetrics & Gynaecology. 2020. **127**(9): 1123-8.
20. Riley, R., et al. *Protective factors and sources of support in the workplace as experienced by UK foundation and junior doctors: A qualitative study*. BMJ Open. 2021. **11**(6): e045588.
21. Riley, R., et al. *Sources of work-related psychological distress experienced by UK-wide foundation and junior doctors: A qualitative study*. BMJ Open. 2021. **11**(6): e043521.
22. Osman, A., et al. *The depression anxiety stress scales—21 [DASS-21]: Further examination of dimensions, scale reliability, and correlates*. Journal of clinical psychology. 2012. **68**(12): 1322–1338.
23. Paykel, E. S., et al. *Suicidal feelings in the general population: A prevalence study*. The British Journal of Psychiatry. 1974. **214**(582): 460–9.
24. King N. and C. Horrocks, *Interviews in Qualitative Research*. 2010, London: Sage.
25. Braun V. and V. Clarke, *Using thematic analysis in psychology*. Qualitative research in psychology, 2006. **3**(2): 77-101.
26. Braun V. and V. Clarke, *Reflecting on reflexive thematic analysis*. Qualitative Research in Sport, Exercise and Health, 2019. **11**(4): 589-97.
27. Johnson, S., et al. *Impact on mental health care and on mental health service users of the COVID-19 pandemic: A mixed methods survey of UK mental health care staff*. Social Psychiatry and Psychiatric Epidemiology, 2021. **56**(1): 25-37.

- 1  
2  
3 28. Kinman G. and K. Teoh K, *What could make a difference to the mental health of UK*  
4 *doctors? A review of the research evidence*. 2018.  
5  
6  
7 29. Kinman, G., et al. *The mental health and wellbeing of nurses and midwives in the*  
8 *United Kingdom*. Royal College of Nursing Foundation and the Society for Occupational  
9 Medicine, 2020.  
10  
11  
12 30. Oliver, D., *The NHS's understaffing is its Achilles' heel*. BMJ: British Medical Journal  
13 (Online), 2017. 357.  
14  
15  
16 31. Boorman, S. *NHS Health and well-being review: Interim report*. NHS Health and  
17 Wellbeing Review, 2009.  
18  
19  
20 32. Amofo, E., et al. *What are the significant factors associated with burnout in*  
21 *doctors?* Occupational Medicine, 2015; **65**(2): 117-21.  
22  
23  
24 33. Pollock, A., et al. *Interventions to support the resilience and mental health of*  
25 *frontline health and social care professionals during and after a disease outbreak, epidemic*  
26 *or pandemic: A mixed methods systematic review*. Cochrane Database of Systematic  
27 Reviews, 2020. 11.  
28  
29  
30 34. Sood, A., et al. *Stress management and resilience training among department of*  
31 *medicine faculty: A pilot randomized clinical trial*. Journal of general internal medicine, 2011.  
32 **26**(8): 858-61.  
33  
34  
35 35. Royal College of Surgeons of Edinburgh,  
36 <https://committees.parliament.uk/writtenevidence/11033/html/>, 2020.  
37  
38  
39 36. Joseph, J., *Resilience as embedded neoliberalism: A governmentality approach*.  
40 Resilience, 2013. **1**(1): 38-52.  
41  
42  
43 37. Traynor, M. *Guest editorial: What's wrong with resilience*. Journal of Research in  
44 Nursing, 2018. **23**(1): 5-8.  
45  
46  
47 38. Seidler, Z. E., et al. *The role of masculinity in men's help-seeking for depression: A*  
48 *systematic review*. Clinical Psychology Review, 2016. **49**: 106-18.  
49  
50  
51 39. Cull, W. L., et al. *Response rates and response bias for 50 surveys of pediatricians*.  
52 Health Services Research, 2005. **40**(1): 213-26.  
53  
54  
55  
56  
57  
58  
59  
60

# BMJ Open

## What challenges did junior doctors face whilst working during the COVID-19 pandemic? A qualitative study

|                                 |                                                                                                                                                                                                                                                                                                                                                                                                                                                                                                                                                                                                                                                                                                                                                                                                                       |
|---------------------------------|-----------------------------------------------------------------------------------------------------------------------------------------------------------------------------------------------------------------------------------------------------------------------------------------------------------------------------------------------------------------------------------------------------------------------------------------------------------------------------------------------------------------------------------------------------------------------------------------------------------------------------------------------------------------------------------------------------------------------------------------------------------------------------------------------------------------------|
| Journal:                        | <i>BMJ Open</i>                                                                                                                                                                                                                                                                                                                                                                                                                                                                                                                                                                                                                                                                                                                                                                                                       |
| Manuscript ID                   | bmjopen-2021-056122.R1                                                                                                                                                                                                                                                                                                                                                                                                                                                                                                                                                                                                                                                                                                                                                                                                |
| Article Type:                   | Original research                                                                                                                                                                                                                                                                                                                                                                                                                                                                                                                                                                                                                                                                                                                                                                                                     |
| Date Submitted by the Author:   | 06-Oct-2021                                                                                                                                                                                                                                                                                                                                                                                                                                                                                                                                                                                                                                                                                                                                                                                                           |
| Complete List of Authors:       | Spiers, Johanna; University of Birmingham, College of Medical and Dental Sciences<br>Buszewicz, Marta; University College London, Research Department of Primary Care and Population Health<br>Chew-Graham, Carolyn; University of Keele<br>Dunning, Alice; Bradford Teaching Hospitals NHS Foundation Trust<br>Taylor, Anna; University of Leeds<br>Gopfert, Anya; Torbay Council<br>Van Hove, Maria; University of Exeter<br>Teoh, Kevin; Birkbeck University of London, Department of Organizational Psychology<br>Appleby, Louis; University of Manchester, Psychiatry & Behavioral Sciences<br>Martin, James; University of Birmingham, Institute of Applied Health Research<br>Riley, Ruth; University of Birmingham Institute of Applied Health Research; University of Birmingham, of Applied Health Research |
| <b>Primary Subject Heading</b>: | Mental health                                                                                                                                                                                                                                                                                                                                                                                                                                                                                                                                                                                                                                                                                                                                                                                                         |
| Secondary Subject Heading:      | Health services research, Medical education and training, Qualitative research                                                                                                                                                                                                                                                                                                                                                                                                                                                                                                                                                                                                                                                                                                                                        |
| Keywords:                       | COVID-19, MENTAL HEALTH, Depression & mood disorders < PSYCHIATRY, QUALITATIVE RESEARCH                                                                                                                                                                                                                                                                                                                                                                                                                                                                                                                                                                                                                                                                                                                               |
|                                 |                                                                                                                                                                                                                                                                                                                                                                                                                                                                                                                                                                                                                                                                                                                                                                                                                       |

SCHOLARONE™  
Manuscripts

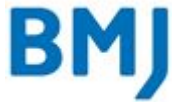

I, the Submitting Author has the right to grant and does grant on behalf of all authors of the Work (as defined in the below author licence), an exclusive licence and/or a non-exclusive licence for contributions from authors who are: i) UK Crown employees; ii) where BMJ has agreed a CC-BY licence shall apply, and/or iii) in accordance with the terms applicable for US Federal Government officers or employees acting as part of their official duties; on a worldwide, perpetual, irrevocable, royalty-free basis to BMJ Publishing Group Ltd ("BMJ") its licensees and where the relevant Journal is co-owned by BMJ to the co-owners of the Journal, to publish the Work in this journal and any other BMJ products and to exploit all rights, as set out in our [licence](#).

The Submitting Author accepts and understands that any supply made under these terms is made by BMJ to the Submitting Author unless you are acting as an employee on behalf of your employer or a postgraduate student of an affiliated institution which is paying any applicable article publishing charge ("APC") for Open Access articles. Where the Submitting Author wishes to make the Work available on an Open Access basis (and intends to pay the relevant APC), the terms of reuse of such Open Access shall be governed by a Creative Commons licence – details of these licences and which [Creative Commons](#) licence will apply to this Work are set out in our licence referred to above.

Other than as permitted in any relevant BMJ Author's Self Archiving Policies, I confirm this Work has not been accepted for publication elsewhere, is not being considered for publication elsewhere and does not duplicate material already published. I confirm all authors consent to publication of this Work and authorise the granting of this licence.

1  
2  
3  
4  
5 What challenges did junior doctors face whilst working during  
6  
7  
8 the COVID-19 pandemic? A qualitative study  
9  
10  
11  
12

13 **Johanna Spiers** (corresponding author)

14 Institute of Applied Health Research

15 University of Birmingham

16 Birmingham

17 United Kingdom

18 j.spiers@bham.ac.uk

19 Tel: 07966 763 364  
20  
21  
22  
23  
24  
25  
26  
27

28 **Marta Buszewicz**

29 Research Department of Primary Care and Population Health

30 University College London Medical School

31 London

32 United Kingdom  
33  
34  
35  
36  
37  
38  
39

40 **Carolyn A. Chew-Graham**

41 School of Medicine

42 Keele University

43 Keele

44 United Kingdom  
45  
46  
47  
48  
49

50 **Alice Dunning**

51 Yorkshire Quality and Safety Research Group

52 Bradford Institute for Health research

53 Bradford Teaching Hospitals NHS Foundation Trust

54 Bradford

55 United Kingdom  
56  
57  
58  
59  
60

1  
2  
3  
4  
5 **Anna K. Taylor**

6 Leeds Institute of Health Sciences

7 Faculty of Medicine and Health

8 University of Leeds

9 Leeds

10 United Kingdom

11  
12  
13  
14  
15  
16  
17  
18 **Anya Gopfert**

19 Torbay Council,

20 Torquay,

21 TQ1 3DR

22  
23  
24  
25  
26  
27 **Maria van Hove**

28 The University of Exeter,

29 Exeter,

30 EX4 4PY

31  
32  
33  
34  
35  
36 **Kevin Rui-Han Teoh**

37 Department of Organizational Psychology

38 Birkbeck, University of London

39 London

40 United Kingdom

41  
42  
43  
44  
45  
46  
47 **Louis Appleby**

48 Division of Psychology and Mental Health

49 School of Medicine

50 University of Manchester

51 Manchester

52 United Kingdom

53  
54  
55  
56  
57  
58  
59 **James Martin**

1  
2  
3 Institute of Applied Health Research  
4  
5 University of Birmingham  
6  
7 Birmingham  
8  
9 United Kingdom  
10

11  
12 **Ruth Riley**

13  
14 Institute of Applied Health Research  
15  
16 University of Birmingham  
17  
18 Birmingham  
19  
20 United Kingdom  
21

22  
23  
24  
25 Keywords: Junior doctors, COVID-19, Occupational Stress, Mental Health, Working  
26  
27 Conditions, Qualitative Methods  
28  
29  
30  
31  
32  
33  
34  
35  
36  
37  
38  
39  
40  
41  
42  
43  
44  
45  
46  
47  
48  
49  
50  
51  
52  
53  
54  
55  
56  
57  
58  
59  
60



# What challenges did junior doctors face whilst working during the COVID-19 pandemic? A qualitative study

## Abstract

**Objectives:** This paper reports findings exploring junior doctors' experiences of working during the COVID-19 pandemic in the UK.

**Design:** Qualitative study using in-depth interviews with 15 junior doctors. Interviews were audio-recorded, transcribed, anonymised and imported into NVivo 12 to facilitate data management. Data were analysed using reflexive thematic analysis.

**Setting:** NHS England.

**Participants:** A purposive sample of 12 female and three male junior doctors who indicated severe depression and/or anxiety on the DASS-21 questionnaire or high suicidality on Paykel's measure were recruited. These doctors self-identified as having lived experience of distress due to their working conditions.

**Results:** We report three major themes. Firstly, the challenges of working during the COVID-19 pandemic, which were both personal and organisational. Personal challenges were characterised by helplessness and included the trauma of seeing many patients dying, fears about safety and being powerless to switch off. Work-related challenges revolved around change and uncertainty, and included increasing workloads, decreasing staff numbers and negative impacts on relationships with colleagues and patients. The second theme was strategies for coping with the impact of COVID-19 on work, which were also both personal and organisational. Personal coping strategies, which appeared limited in their usefulness, were problem and emotion-focused. Several participants appeared to have moved from coping towards learned helplessness. Some organisations reacted to COVID-19 collaboratively and flexibly. Thirdly, participants reported a positive impact of the COVID-19

1  
2  
3 pandemic on working practices, which included simplified new ways of working – such as  
4 consistent teams and longer rotations – as well as increased camaraderie and support.  
5  
6  
7

8  
9 Conclusions: The trauma that junior doctors experienced whilst working during Covid-19 led  
10 to powerlessness and a reduction in the benefit of individual coping strategies. This may  
11 have resulted in feelings of resignation. We recommend that, post-pandemic, junior doctors  
12 are offered stronger psychological and practical support.  
13  
14  
15  
16

### 17 18 Article summary: Strengths and limitations 19

- 20  
21 • Participants were interviewed at the peak of the second wave of COVID-19 during  
22 the UK, meaning transcripts contain data that are highly relevant to the research  
23 question  
24
- 25  
26 • In-depth, reflexive thematic analysis was carried out on the data, leading to the  
27 development of rich, insightful themes  
28
- 29  
30 • Female participants outnumbered male participants in this study, potentially leading  
31 to gender imbalance  
32
- 33  
34 • Additionally, the wider study was not initially designed to explore experiences of  
35 working during COVID-19. Instead, participants naturally discussed this topic during  
36 interviews.  
37  
38  
39  
40

### 41 42 Funding statement 43

44  
45 The study was funded by NIHR Research for Patient Benefit (grant number PB-PG-0418-  
46 20023). Please note that CCG is part-funded by West Midlands ARC.  
47  
48  
49

### 50 51 Competing interests 52

53  
54 None  
55  
56  
57  
58  
59  
60

## Introduction

Doctors are more vulnerable to mental illnesses [such as anxiety and depression] and suicide than the general population [1, 2]. In recent years, including those before the COVID-19 pandemic, UK doctors have reported understaffing, stretched resources, increased workload and burnout [3-7].

There is an additional need to attend to frontline workers' wellbeing during health crises [6-8]. Frontline workers caring for COVID-19 patients have reported stress and distress due to the strain on healthcare systems [9]. Such stressors include the need for rapid training around treating a new illness [9] and the psychological impact of exposure to unprecedented levels of suffering and COVID-19-related deaths, both of patients and colleagues [8, 10, 11].

These stressors led to healthcare professionals (HCP) reporting fears about contracting or spreading the virus as well as uncertainty due to new ways of working [11, 12]. Impacts of these fears and stressors include reduced sleep, self-harm, panic attacks, guilt, relationship breakdowns [11], concerns about lack of training [7] and psychological trauma [10].

The UK reported some of the highest numbers of COVID-19 cases in Europe [7]. In a recent paper, almost half of the 224 UK doctors surveyed (from junior doctors to consultants) felt that their mental health had been harmed by the pandemic, while a third reported impacts to their physical health [5]. Increased healthcare worker burnout is, therefore, a major concern at this time. We need a holistic understanding of the experiences and needs of frontline workers to mitigate psychological distress and burnout [11].

'Junior doctor' is the term given to qualified doctors who are still in training whilst working. They may have eight or more years of experience, depending on their speciality [13]. Junior doctors have reported fears that they will 'fail' or appear 'weak' if they take time off sick, making it harder for them to report mental health concerns [14]. This group faced unique challenges during COVID-19 due to uncertainties about exams [6], potential redeployment [8, 15, 16] and concerns about their learning opportunities [15, 16]. UK junior doctors have

1  
2  
3 reported that they did not receive enough education before treating COVID-19 patients  
4 [15]. They were also often faced with the difficult task of contacting patients' families to  
5 provide updates, since relatives were typically not permitted to visit [15].  
6  
7  
8  
9

10 Despite this, few researchers have looked in-depth at the psychological experiences of  
11 junior doctors. Instead, they have explored practical matters relating to this group, such as  
12 the resilience of new rotas (that is, assigning enough staff to cope with the workload) [17],  
13 redeployment [15, 16], the impact on training [18] and the provision of certain services such  
14 as obs and gynae [19].  
15  
16  
17  
18  
19

20  
21 Researchers have posited the need for more in-depth qualitative analysis in this area [5, 11].  
22 This paper is part of a wider study [20, 21] designed to explore the impact of working  
23 conditions and cultures on junior doctors in general. Data collection coincided with the  
24 second wave of the pandemic in the UK, meaning the topic naturally arose for all 15  
25 participants interviewed. As such, we aim to address this crucial gap in the literature and  
26 reflect the experiences of junior doctors working within the context of COVID-19.  
27  
28  
29  
30  
31  
32  
33

## 34 Method

### 35 Study design and setting

36 This qualitative study is part of a larger mixed-methods study exploring junior doctors'  
37 perceptions of stress and distress. Semi-structured interviews were used to explore junior  
38 doctors' experiences of working during COVID-19. The study setting was the NHS in England.  
39  
40  
41  
42  
43  
44  
45

### 46 Sampling and recruitment

47 A total of 456 junior doctors were initially recruited for an online survey exploring working  
48 cultures, psychological distress and suicidality between November 2020 and March 2021.  
49 They self-identified as participants, accessing the survey through posts on social media,  
50 junior doctor forums and via emails sent from their speciality schools. Survey participants  
51 whose results indicated severe depression and/or anxiety on the DASS-21 questionnaire  
52 [22] or high suicidality on Paykel's measure [23] were contacted via email to ask if they  
53 would like to take part in an in-depth, qualitative survey. As such, it should be noted that, in  
54  
55  
56  
57  
58  
59  
60

1  
2  
3 line with our qualitative methodology, this was a small, purposive sample of junior doctors  
4 who were experiencing stress and distress as a result of their working conditions. Thus,  
5 findings cannot be generalised to all junior doctors. However, it should also be noted that  
6 levels of distress were high in the whole sample of surveyed junior doctors. A total of 27  
7 potential participants were contacted, of which 15 were female, nine male, three  
8 undisclosed.  
9  
10  
11  
12  
13  
14  
15

16 Interested individuals contacted JS and gave informed consent. Participants were given the  
17 chance to ask JS questions about the research team and the study before interviews went  
18 ahead. Fifteen junior doctors (12 female, three male) were recruited.  
19  
20  
21  
22

### 23 Data collection

24 A semi-structured interview guide was developed by the research team and modified  
25 iteratively as data collection and analysis progressed. This guide aimed to capture  
26 participants' views, experiences, feelings and beliefs about working conditions and cultures  
27 which were perceived as stressful or distressing. The guide was informed by the existing  
28 literature [1, 3, 14], input from junior doctors on the study team as well as patient and  
29 public involvement (PPI) consultation exercises conducted before obtaining funding.  
30 Following conventions for semi-structured interviews [24], points from the topic guide were  
31 followed up with individualised questions exploring topics of interest and importance for  
32 each participant.  
33  
34  
35  
36  
37  
38  
39  
40  
41  
42  
43

44 Interviews were conducted either on the telephone or via video call, from participants'  
45 homes or places of work. They took place between December 2020 and February 2021 –  
46 that is, during the second wave of the COVID-19 pandemic in the UK – and at a date and  
47 time that were convenient to the participants. A risk protocol was used to ensure that  
48 appropriate support from two senior GPs who were on the study team and/or Practitioner  
49 Health would be provided to participants in the event of the disclosure of suicidal ideation.  
50 The in-depth interviews were conducted by JS, a female PhD psychologist with extensive  
51 qualitative methods expertise. JS also recorded any pertinent observations in field notes  
52 following each interview. Interviews ranged from 29 minutes to 102 minutes in length  
53 (mean = 62.8 minutes).  
54  
55  
56  
57  
58  
59  
60

1  
2  
3  
4  
5 The audio-recorded interviews were transcribed verbatim and checked for accuracy by JS  
6 before analysis. All transcripts were anonymised before discussion within the wider  
7 research team. Reflexive notes were recorded by researchers throughout the process.  
8  
9

### 10 11 12 Patient and public involvement and engagement

13  
14 There are three junior doctors on the research team, all of whom consulted with other  
15 colleagues in the PPI team about the initial research idea and participated in analysis  
16 meetings. Five junior doctors gave feedback on the initial funding application, while four fed  
17 back on the protocol, topic guide and participant-facing documents.  
18  
19  
20  
21  
22

### 23 24 Data analysis

25  
26 Data were analysed by JS using reflexive thematic analysis [25, 26], in which themes  
27 highlight patterns of shared meaning united by a core concept. An inductive, explicit, critical  
28 realist approach was adopted, since this was in line with the researchers' desire for a rich,  
29 data-driven analysis which demonstrated the interplay between events and participants'  
30 interpretations of those events [25]. Data saturation is not a relevant concept within this  
31 type of approach, in which it is accepted that each new participant adds fresh insights.  
32  
33 Analysis began once all interviews had been conducted. Transcripts were analysed one by  
34 one using NVivo 12. As analysis progressed, a table of themes was generated and refined.  
35  
36 Each new transcript led to new codes and themes being added or expanded. In addition,  
37  
38 four members of the team, one of whom was a junior doctor and two of whom were  
39  
40 academic GPs (RR, MB, AT, CCG), read and fed back on six of the 15 interviews. Their views  
41  
42 and insights were collaboratively incorporated into the NVivo codes. JS then refined these  
43  
44 codes to create relevant tables of themes once all interviews had been analysed and  
45  
46 discussed. Analysis continued and deepened during the write-up, where shared meanings  
47  
48 were generated and described for each theme [26].  
49  
50  
51  
52  
53  
54

### 55 56 Reflexivity

57  
58 RR, the study PI, is epistemologically steeped in qualitative traditions underpinned by  
59  
60 interpretivism and phenomenology, and is oriented by critical theory such as feminism. This

1  
2  
3 is likely to have influenced her interest in exploring why female doctors are more likely to  
4 experience distress.  
5  
6  
7

8 JS, the lead analyst on this paper, is a qualitative health psychologist. She has an interest in  
9 in-depth, interpretative methods. She is white, cis-gendered, heterosexual and able-bodied.  
10 This heteronormative positioning is likely to have impacted her interviewing and analysis.  
11  
12  
13  
14

15  
16 Both researchers have an interest in the systemic issues impacting individual NHS workers  
17 and are motivated by trying to find organisational – rather than individual – solutions for  
18 those workers.  
19  
20  
21  
22

23 The junior doctor (AT) and academic GPs (MB and CCG) who also contributed to analysis of  
24 the data have experienced and observed events during their professional lives which may  
25 have influenced how strongly they interpreted the data. Additionally, MB and CCG have a  
26 strong interest in mental health.  
27  
28  
29  
30  
31

### 32 Findings

33 All fifteen participants discussed the impact of COVID-19 on their working conditions.  
34 Findings divided into three major themes: Challenges of working during the COVID-19  
35 pandemic; Strategies for coping with the impact of COVID-19 on work; Positive impact of  
36 the COVID-19 pandemic on working practices.  
37  
38  
39  
40  
41  
42  
43

44 See Table One for an overview of all relevant themes and subthemes.  
45  
46  
47  
48  
49  
50  
51  
52  
53  
54  
55  
56  
57  
58  
59  
60

| Theme                                                                                                                                                                                             | Subtheme                                                                                                                                          |
|---------------------------------------------------------------------------------------------------------------------------------------------------------------------------------------------------|---------------------------------------------------------------------------------------------------------------------------------------------------|
| <p>Challenges of working during the Covid-19 pandemic<br/> <i>"patients were just dying in front of us so quickly and they were young" (P5)</i></p>                                               | <p>Personal impact: Helplessness in the face of trauma<br/> <i>"my sleep is awful again, I'm waking up, I think COVID hasn't helped" (P1)</i></p> |
|                                                                                                                                                                                                   | <p>Work-related impact: Change and uncertainty<br/> <i>"I gained 14 new patients who I'd not met before" (P6)</i></p>                             |
| <p>Strategies for coping with the impact of Covid-19 on work<br/> <i>"So although I should have moved on from GP I ended up staying in GP so I was actually there for eight months." (P7)</i></p> | <p>Limitations of personal strategies<br/> <i>"I cried a lot" (P14)</i></p>                                                                       |
|                                                                                                                                                                                                   | <p>Organisational strategies<br/> <i>"we'd kind of share what we've learned" (P5)</i></p>                                                         |
| <p>Positive impact of Covid-19 on working practices<br/> <i>"since COVID, things have improved slightly there's, um we have something called like the rest and recuperation hub." (P6)</i></p>    | <p>Positive new ways of working<br/> <i>"We almost looked forward to going to work" (P8)</i></p>                                                  |
|                                                                                                                                                                                                   | <p>Additional support and camaraderie<br/> <i>"they provided hot meals" (P5)</i></p>                                                              |

**Table one: Table of themes for junior doctors' experience of working during the Covid-19 pandemic**



### Challenges of working during the COVID-19 pandemic

Participants described challenges related to their work as junior doctors during the COVID-19 pandemic. Challenges were personal or work-related.

#### *Personal impact: Helplessness in the face of trauma*

Working as junior doctors during the COVID-19 pandemic affected participants' mental health. Throughout this theme, there is a sense that participants felt helpless and powerless as they strove to carry out their jobs in such unmapped, traumatic territories.

One participant described the harmful impact of being exposed to death and suffering:

*I'd seen [pause] a whole ward just emptied out and then refilled overnight, after people had just died. It was horrendous. Uh, I was like, "I need to talk to somebody about this or I'm just going to go home and cry". (P5, female)*

This participant's language – 'emptied out' and 'refilled' – suggests that the COVID-19 patients had become dehumanised for her; a mass of unwell bodies who were dying and being replaced in an almost mechanical manner. She was helpless to stop this flow of nameless bodies.

Participants felt helpless in the face of fears for their own safety and that of their loved ones. Initially, they were unsure of how to protect themselves or of the risk they might pose to their families:

*...we had someone that we thought was, um, COVID, but it was very, very early on. And I remember being told off for wearing a mask. (P3, female)*

*...we were worried about if we were taking home our clothes, if we were making other people sick, if we would get sick, it was an incredibly stressful working environment. (P5, female)*

1  
2  
3 As time went on, fears for personal safety came from different sources, with one participant  
4 reporting that her colleagues were not maintaining safety standards. However, as a junior  
5 doctor, she felt powerless to ask for this to change:  
6  
7  
8  
9

10 *It's not patients, it's staff. I find that really stressful. Like you walk past an office and*  
11 *there might be two or three people sat in an office having a chat, all with their masks*  
12 *under their chin. [...] I don't feel confident enough to knock on the window and be like*  
13 *guys, what are you doing? But I know that them doing it puts me more at risk and puts*  
14 *the patients at risk. [...] You see stuff being wrong and you're like every day, like*  
15 *multiple times a day you're like do I say something, do I not say something? And you*  
16 *feel bad for not saying something. (P10, female)*  
17  
18  
19  
20  
21  
22  
23  
24

25 This description of this discomfort could be defined as moral injury; that is, the distress that  
26 occurs when a person witnesses or carries out an act that is contrary to their values. The  
27 participant felt uncomfortable and helpless however she responded.  
28  
29  
30  
31

32 Participants felt powerless to switch off or rest when they got home from work:  
33  
34  
35

36 *You couldn't switch off, you never felt like you'd had, uh, done a good job. (P5, female)*  
37  
38  
39

40 *...my sleep is awful again, I'm waking up, I think COVID hasn't helped with these sort of*  
41 *flashbacks. (P1, female)*  
42  
43  
44

45 Participants often did not feel supported in the new working environment caused by COVID-  
46 19, which led to further helplessness, fear and trauma. The lack of support could be  
47 practical:  
48  
49  
50  
51

52 *I'm going to personally take responsibility for changing [...] the big scary machine that*  
53 *I'm not trained in, and, uh, figure out how it works, whilst the patient is there trying to*  
54 *physically die in front of me, but so are five others, so oh well, no help is coming. (P5,*  
55 *female)*  
56  
57  
58  
59  
60

1  
2  
3 Some felt unsupported psychologically, with one participant appearing to feel that her  
4 needs were invisible to those who might support her:  
5  
6  
7

8  
9 *...they got some psychologists who would be available and very occasionally they*  
10 *would come on the ward. [pause] And they would talk to the nurses. And that was it.*  
11 *No. It felt assumed to be on the nurses and people working in ITU and just ordinary*  
12 *junior doctors didn't [pause] didn't seem to matter. (P14, female)*  
13  
14  
15  
16

17  
18 Another felt unsupported in terms of her physical health; her safety was compromised,  
19 meaning she was unable to protect herself:  
20  
21  
22

23 *...you will turn up on a ward and you will find out halfway through handover that*  
24 *they've had a positive case over the weekend. (P10, female)*  
25  
26  
27  
28

29 Additionally, a junior doctor whose family were overseas reported feeling unsupported by  
30 her hospital after contracting COVID-19:  
31  
32  
33

34 *...when I went to quarantine, I realised that no-one actually cares about you from the*  
35 *hospital? [...] No-one called me! [...] When I was very very sick, imagine that, if I had, if*  
36 *I had literally no-one. (P4, female)*  
37  
38  
39  
40  
41

#### 42 *Work-related impact: Change and uncertainty*

43  
44

45 The work-related impact of working during a COVID-19 context centred around uncertainty  
46 and change. These included changes to workload, staffing levels, relationships with  
47 colleagues and patients, lack of support and uncertainty around new ways of working.  
48  
49  
50  
51

52 The junior doctors' workload grew significantly when COVID-19 hit, leading to further  
53 stressors. This led to a huge and stressful increase in one participant's responsibilities:  
54  
55  
56  
57  
58  
59  
60

1  
2  
3 *...on a Friday in the middle of the day when there was no consultant around [...] I*  
4 *gained 14 new patients who I'd not met before [...] that was a really stressful day. (P6,*  
5 *female)*  
6  
7  
8  
9

10 Workload increased out of hours as well, as participants were constantly having to learn  
11 new facts about the virus and its management. The quote below demonstrates the doubt  
12 and pressure felt whilst trying to learn in the face of unmanageable amounts of new  
13 information:  
14  
15  
16  
17

18  
19  
20 *So we were getting 20 emails a day, and every single one would have a red flag saying*  
21 *“vital, important, must read”, and you’d worry you’d missed something [...] there's so*  
22 *much information, it was constant, and you couldn't switch off, because it would*  
23 *impact your job. (P5, female)*  
24  
25  
26  
27

28  
29 As workload rose, staffing levels, which had already been stretched, were further adversely  
30 affected by further staff reductions due to illness or the need to self-isolate, demonstrating  
31 further change and uncertainty:  
32  
33  
34

35  
36 *So it's very very short-staffed because a lot of the people are self-isolating, ill with*  
37 *COVID, or just because you know they've worked already five or six days in a row, and*  
38 *obviously they're quite tired and they have to take a break. (P12, male)*  
39  
40  
41  
42

43 The additional workload changed working relationships in various ways. Participants  
44 reported that colleagues became irritable or verbally aggressive due to increased stress:  
45  
46  
47

48  
49 *I think everyone got a little bit more [pause], um, maybe snippy? With each other?*  
50 *'Cause we were all are very stressed and anxious. (P3, female)*  
51  
52  
53  
54  
55  
56  
57  
58  
59  
60

1  
2  
3 *...a registrar wearing an MF53 mask<sup>1</sup> and the consultant laying into him basically*  
4 *shouting at him that [...] he was depriving someone else who actually needed this*  
5 *mask [...] emotions were running high because people were scared. (P14, female)*  
6  
7  
8  
9

10 One trainee, based in general practice, reported that patients had become abusive during  
11 telephone appointments, potentially dehumanising their doctors:  
12  
13  
14

15  
16 *...sometimes people lose sense of the fact that it's another human being on the end of*  
17 *the phone with them. And you're already dehumanised a little bit as a doctor because*  
18 *people expect you to be more than, more than human. And when you then couple that*  
19 *with someone just being this kind of like faceless voice on the end of the phone,*  
20 *especially when people are scared or something like that, it just there's that*  
21 *heightened level of aggression. (P7, female)*  
22  
23  
24  
25  
26  
27  
28

29 That participant also reported finding the change to telephone appointments clinically  
30 challenging and risky in terms of being able to diagnose patients accurately.  
31  
32  
33

34 *I don't think you realise how much you rely on seeing someone in front of you to know*  
35 *how well they are. And talking to someone over the phone it just feels a lot more*  
36 *dangerous. (P7, female)*  
37  
38  
39  
40  
41

42 Compounding these changes which made participants' working lives harder was the fact  
43 that it also became harder to speak with and get support from peers due to the safety  
44 measures:  
45  
46  
47  
48

49 *Um, and now with COVID where you're only allowed, like, two people in each room, it,*  
50 *it's very difficult to, um, socialise and talk. (P8, female)*  
51  
52  
53  
54

55 As junior doctors in training, participants also found the uncertainty around changes to  
56 rotas and exams challenging:  
57  
58  
59

---

60 <sup>1</sup> This is a full face, military style of mask

1  
2  
3  
4  
5 *...a fair amount of uncertainty and the problem this time is that, ah, a lot of courses*  
6 *are still going ahead, exams are still going ahead, but we've been moved onto*  
7 *emergency rotas with a week's notice. (P8, female)*  
8  
9

10  
11  
12 The junior doctors were often expected to work in different specialities or locations from  
13 those which they had been allocated to pre-pandemic. Constant anxiety due to uncertainty  
14 about redeployment was reported:  
15  
16

17  
18  
19  
20 *...anxious and uncertain about whether that was going to happen and*  
21 *would sort of check my emails pretty consistently to see whether that was*  
22 *actually whether that was going to be um delayed or stopped because of*  
23 *COVID redeployment. (P6, female)*  
24  
25  
26  
27  
28  
29

30 The pandemic meant that new ways of working were quickly developed and implemented.  
31 Trying to adjust to these changes was another challenge. One trainee in psychiatry talked  
32 about the potential stress and impact on patient care of working from home:  
33  
34  
35

36  
37 *...you've not got those people around you to bounce things off, so you might get an*  
38 *email and it might be quite an anxiety-inducing email because it might say someone's*  
39 *suicidal, you need to see them, and you're thinking, oh, I can't see them, erm, and*  
40 *normally, kind of in an office you'd just be able to ask, can anyone else see them? (P2,*  
41 *female)*  
42  
43  
44  
45  
46  
47  
48

#### 49 Strategies for coping with the impact of COVID-19 on work

50

51  
52 Participants described both personal and organisational strategies for coping with the above  
53 challenges.  
54  
55  
56  
57  
58  
59  
60

### *Limitations of personal coping strategies*

Emotion-focused and problem-focused coping strategies were utilised for dealing with the challenges of COVID-19. However, there was a sense that these personal coping strategies, which might have been adequate before COVID-19, were not enough to protect participants from the impact of working during the pandemic.

Emotion-based coping strategies included crying:

*So I cried a lot outside. Because it was getting warmer so you could go outside. Hug a tree, cry. (P14, female)*

Stoicism was used by some, although this latter strategy suggested a sense of resignation, illustrated by P8's rhetorical question:

*And [pause] and in a way it didn't really matter that our rota changed, because there was nothing else to do? (P8, female)*

A sense of powerlessness combined with acceptance was perceived to have impacted the profession as a whole:

*I think erm you know everyone's a bit more sort of resigned to things now and it feels like we've sort of erm entered a collective sort of depressive state of acceptance. (P9, male)*

We can see that these personal, emotion-based coping strategies had their limits when employed during the COVID-19 pandemic.

1  
2  
3 Problem-focused strategies were perhaps more effective. One participant volunteered to  
4 take on the work of calling relatives to let them know their loved ones were very sick,  
5 perhaps to be able to provide a more personal input to such a traumatic situation.  
6  
7  
8  
9

10 *I used to volunteer to kind of be the person making those phone calls, cos it was, it felt*  
11 *like you were able to do something about it at least? It wasn't that sort of like, "I put*  
12 *lines in people and hopefully", and then just watching them die. (P5, female)*  
13  
14  
15  
16

17  
18 Another participant agentically took control of her situation by arranging more support for  
19 herself, perhaps in response to the helplessness described in the previous theme:  
20  
21  
22

23 *...when lockdown came back in [...] I noticed that like I was feeling low so I referred*  
24 *myself to the Let's Talk Wellbeing, erm which is like the community, CBT, GP, self-*  
25 *referral system. And I found that really helpful erm so that kind of stopped me*  
26 *spiralling. (P10, female)*  
27  
28  
29  
30  
31  
32

### 33 *Organisational strategies*

34  
35  
36

37 Just as participants found ways to cope with the challenges of COVID-19, so did the  
38 organisations and teams for whom they worked, with some trusts and teams demonstrating  
39 collaborative, flexible thinking. One participant reported flexibility in terms of working from  
40 home for colleagues who had to self-isolate:  
41  
42  
43  
44  
45

46 *...most of the places have let the person sort of choose whether they you know, if it's*  
47 *your child that's got a fever and actually you know you're isolating and could do things*  
48 *then that's fine. But if you're poorly then you're poorly and that's fine. (P11, female)*  
49  
50  
51  
52

53 Another described the need for her team to make pragmatic decisions about how to treat  
54 COVID-19 patients:  
55  
56  
57  
58  
59  
60



1  
2  
3 *So if someone was clearly dying, they would [pause] be stepped down to a normal*  
4 *ward because on a normal ward they could at least have a visitor for one hour a day.*  
5  
6  
7 *(P14, female)*  
8  
9

10 A third participant reported that her team pulled together to help one another in the new  
11 circumstances:  
12  
13

14  
15  
16 *...there'd be so many [emails] even coming in during our shift, we'd divide it up, so*  
17 *we'd say, "you read these five, I'll read these five, you read these five, and then I'll read*  
18 *these five", and then we'd kind of share what we've learned from them. (P5, female)*  
19  
20  
21  
22

### 23 Positive impact of COVID-19 on working practices

24

25  
26  
27 Participants reported that working as junior doctors during the COVID-19 pandemic had  
28 some positive impacts. These were included new and less bureaucratic ways of working as  
29 well as additional support and camaraderie.  
30  
31  
32

### 33 *Positive new ways of working*

34

35  
36  
37 Positive changes revolved around a less bureaucratic way of working, which included  
38 consistent teams, longer rotations and less red tape.  
39  
40  
41  
42

43  
44 Several participants reported that they were now working in a consistent team, rather than  
45 regularly working with new colleagues. This was experienced as positive:  
46  
47  
48

49  
50 *So normally, you're kind of working with somebody new every day almost. But we*  
51 *worked in teams that didn't rotate, so you had [...] this team that you worked with very*  
52 *intensely for those four months as well, and that support structure was really good.*  
53  
54  
55 *(P5, female)*  
56  
57  
58  
59  
60

1  
2  
3 *...we got really to know each other, we had a little social WhatsApp group where we'd,*  
4 *like, post pictures of the cakes we were gonna bring in, you know, everyone bought in*  
5 *food. We almost looked forward to going to work because you were like, oh, my*  
6 *buddies are there. (P8, female)*  
7  
8  
9

10  
11  
12 A sense of being part of a team who enjoy work comes across in the above quote, where  
13 cake and conversation bring some positivity to bleak picture painted thus far.  
14  
15

16  
17  
18 Rotations were paused for many junior doctors. Although this could lead to uncertainty, as  
19 reported in an earlier theme, it also had some potentially positive impacts:  
20  
21

22  
23 *So we were on the first rotation for four months and then the second for eight months*  
24 *[...] Um, so, I guess it would have depended on what ward you got stuck on?*  
25 *[interviewer laughs] Um, I got stuck on one of the nice placements, I really enjoyed*  
26 *myself on the ward. (P3, female)*  
27  
28  
29

30  
31  
32 Various practical changes to working patterns were also experienced as positive. These  
33 included simple factors such as the ability to work from home and reduced red tape:  
34  
35

36  
37  
38 *...just get away and do something relaxing, even if it's just go for a walk around the*  
39 *local canal and come back on a lunchtime is so much more achievable when you're*  
40 *working from home. So I think that's been really good. (P2, female)*  
41  
42  
43

44  
45 *...they say oh, we want you to travel to a hospital on your day off to show us your*  
46 *passport and your GMC certificate. And it's like I've been – doing this for 10 years. I've*  
47 *worked for you six times! Like, you've got my details [both laugh]. And that's one thing*  
48 *where COVID has been really good because now they do it online and I'm like, why*  
49 *couldn't you have always done this? (P8, female)*  
50  
51  
52  
53  
54

55  
56 One participant even appeared to cite COVID-19 as a motivator for returning to work at the  
57 NHS after time in another career:  
58  
59  
60

1  
2  
3 ...then COVID came and I wanted to come back to medicine anyway so I thought okay  
4 fine then let's just crack on with erm with the NHS. (P15, female)  
5  
6  
7  
8  
9

### 10 *Additional support and camaraderie*

11  
12  
13

14 Some participants reported that new supportive measures, such as additional facilities, had  
15 been put in place by their workplaces:  
16  
17

18  
19  
20 ...they provided hot meals, which, at the beginning, when there were huge queues at  
21 the supermarket, and we were working 12-hour shifts, five days a week, and, um,  
22 [pause] and it was unpredictable whether you could kind of get food, because there  
23 were a lot of shortages and things. (P5, female)  
24  
25  
26  
27

28  
29 And since COVID, things have improved slightly, there's, um we have something called  
30 like the rest and recuperation hub, which is like a room erm that does free teas and  
31 coffees and a few snacks [...] you go there on your breaks to relax. (P6, female)  
32  
33  
34  
35

36 Another participant reported that her hospital made an effort to offer junior doctors  
37 support, although this was against the backdrop of a toxic working environment:  
38  
39

40  
41 I'd say the culture's getting worse except for the fact that they send an e-mail out  
42 every now and again with some contact numbers [for support services] and that's  
43 what COVID has done. (P1, female)  
44  
45  
46  
47  
48

49 It should be noted that the reports of improved support were tempered – as in the  
50 description of 'slight' improvements to a culture that was also described as 'getting worse'.  
51  
52  
53

## 54 Discussion

55  
56  
57

58 Fifteen distressed junior doctors were interviewed between December 2020 and February  
59 2021 about their perceptions of stress and distress in their workplace cultures. All  
60

1  
2  
3 participants discussed how COVID-19 impacted their experiences. Looking at our themes as  
4 a gestalt, we suggest that the helplessness that arose due to the trauma of working during  
5 the pandemic meant that individual coping strategies which may have been more beneficial  
6 during less unusual times fell short, something that often went unrecognised by employers.  
7 To compound this, participants were also not sufficiently supported either practically or  
8 psychologically during this time. This may have led to feeling powerless and resigned in the  
9 face of difficult circumstances for which they were unprepared. Additionally, we  
10 recommend that the positive lessons highlighted in this paper are adhered to.  
11  
12  
13  
14  
15  
16  
17  
18  
19

20 Helplessness was commonly reported whilst during in the context of COVID-19. Specifically,  
21 one participant described how traumatic it was to see so many patients dying. Others [8, 10,  
22 27] have cited grief and managing such large numbers of patient deaths as especially  
23 challenging. We suggest that newer junior doctors might need extra support to process grief  
24 in such exceptional circumstances, for which they had not been trained. This might  
25 especially be the case for younger doctors [28] and female doctors [29, 1] since it has been  
26 shown that these groups, who made up the majority of participants in the current study, are  
27 potentially more vulnerable to depression, stress and suicidal thoughts.  
28  
29  
30  
31  
32  
33  
34  
35

36 Another participant reported an experience of moral injury following the unsafe behaviour  
37 of other staff members. Moral injury due to redeployment away from long-term patients  
38 [15] and concerns about letting patients down [8] during COVID-19 has also been reported.  
39 Our findings add an additional perspective, demonstrating that moral injury can also arise  
40 due to staff members neglecting safety protocols.  
41  
42  
43  
44  
45  
46

47 Adding to these traumatic personal experiences, participants reported that while their  
48 workload rose due, staffing levels often decreased. Previous research has shown that,  
49 following austerity [30], UK HCPs were already working in an under-resourced environment  
50 and that additional workload is a potent stressor [21, 31-33]. Crises such as COVID-19  
51 further emphasise the need for extra resources for our healthcare system, echoing the  
52 recommendations of the 2009 Boorman report [34], which have been widely neglected [6].  
53 It is often harder for frontline workers to take breaks during a pandemic [5, 10], adding to  
54 the potential for burnout since longer working hours are a risk factor [29]. Cubitt and  
55  
56  
57  
58  
59  
60

1  
2  
3 colleagues [5] have highlighted the need for rotas that enable well-being rather than merely  
4 being resilient. Qualitative research such as the current study adds depth to these  
5 recommendations by demonstrating the instability, lack of support and powerlessness that  
6 distressed HCPs faced during this time.  
7  
8  
9

10  
11  
12 Participants felt unsupported whilst working in these new, traumatic circumstances, a  
13 finding reflected elsewhere [7, 10, 11]. For example, one participant who needed  
14 psychological support intimated that she felt invisible. Whilst the needs of others – nurses  
15 and non-medical staff – were considered, her needs were assumed not to exist,  
16 demonstrating the powerlessness of the junior doctors in this situation. If you cannot be  
17 seen, you cannot be helped.  
18  
19  
20  
21  
22  
23

24  
25 The need for extra training and support for junior doctors during pandemics has been  
26 reported [15]. We echo this recommendation and would add that support could come from  
27 good leadership which recognises the challenges staff face, a feeling of being valued within  
28 a team and by addressing the practical and physical limitations junior doctors frequently  
29 experience, such as poor 'on call' accommodation and access to regular meals. We suggest  
30 that employers often fail to recognise the limitations of individual coping strategies, both  
31 during crises such as the pandemic and in less unusual times.  
32  
33  
34  
35  
36  
37  
38  
39

40 Participants used various strategies to attempt to cope with working during COVID-19.  
41 Emotion-focused strategies such as crying were reported in our study, although these  
42 strategies often appeared limited in usefulness. At times, the stoicism reported by  
43 participants in the current study verged on learned helplessness, demonstrating that  
44 personal coping strategies alone are not enough, and that coping is not guaranteed in a  
45 healthcare crisis when doctors are already stressed and distressed. Various individualised  
46 coping strategies have been suggested, including healthy eating, attending training, going to  
47 therapy, support networks [6] and making use of 'wobble rooms' [15]. However, San Juan  
48 and colleagues [6] recognised that finding time for these activities might be difficult,  
49 particularly during a time of crisis.  
50  
51  
52  
53  
54  
55  
56  
57  
58  
59  
60

1  
2  
3 Owens et al. [30] state that if we are continually asking our HCPs to behave heroically in  
4 exceptional circumstances, we are inviting burnout. Indeed, it could be posited that  
5 encouraging such strategies places the responsibility for managing the unmanageable with  
6 individuals, rather than the system [6]. It is argued that, in our current neo-liberal culture,  
7 responsibility for wellbeing is often placed on the individual, exonerating the state and  
8 systems for the wellbeing of workers [30, 35, 36]. This can be seen in the use of the term  
9 'resilience', which places responsibility for managing the unmanageable on the shoulders of  
10 individuals, rather than organisations [35, 36]. Therefore, in line with San Juan et al. [6], we  
11 recommend a focus on organisational, rather than personal, coping strategies. Those  
12 organisational strategies should, as in our findings, include flexibility and better  
13 organisational, managerial and peer-support through teamwork and collaboration as well as  
14 addressing the practical workplace issues which could lead to HCPs feeling physically safe  
15 and cared for. Vulnerable junior doctors need organisational support especially, although  
16 not exclusively, during crises like COVID-19. However, the emphasis continues to be on  
17 individual [37, 38].  
18  
19  
20  
21  
22  
23  
24  
25  
26  
27  
28  
29  
30  
31

32 Participants reported several potentially positive impacts of working during the pandemic, a  
33 novel finding. These included working in more consistent teams. San Juan and colleagues [6]  
34 have similarly reported that consistent teams are helpful for HCPs, while inconsistent teams  
35 make it harder for junior doctors to seek support [14], increasing stress and vulnerability to  
36 mental ill-health [21]. As such, we recommend that, where possible, policymakers consider  
37 the use of consistent teams for junior doctors going forward. The beneficial impact of a  
38 reduction in bureaucracy reported by one participant appears to be another novel finding.  
39 We would suggest any such reductions should be maintained after the pandemic ends, with  
40 a potential reduction in time pressures for junior – and senior – doctors.  
41  
42  
43  
44  
45  
46  
47  
48  
49  
50

51 Participants stated that some new supportive measures, such as rest hubs, had been put  
52 into place during COVID-19. Such spaces have been deemed helpful by other researchers [7,  
53 10, 15], although there are anecdotal reports that many of these spaces have now been  
54 closed as hospitalisations from COVID-19 reduce. In contrast, HCPs in other studies have  
55  
56  
57  
58  
59  
60

1  
2  
3 reported that the extra strain on the system meant that there were fewer places than usual  
4 to shower, rest or relax with colleagues [5, 6].  
5  
6  
7

8  
9 In line with our findings, Vindrola-Padros et al. [7] reported that there was extra signposting  
10 towards support during COVID-19; however, there was not often time to engage with this  
11 support. Additionally, it has been anecdotally reported that much of this support has been  
12 withdrawn now. This adds further weight to the notion that systemic, holistic changes are  
13 needed to support NHS staff, rather than focusing the responsibility for change on  
14 individuals [6]. We suggest that such limited responses from employers may have  
15 contributed to the feelings of resignation described by some of our participants.  
16  
17  
18  
19  
20  
21  
22

### 23 Limitations

24  
25 This study has various strengths, including being the first qualitative paper (to our  
26 knowledge) to explore the experiences of junior doctors during COVID-19. Our data was  
27 collected during the pandemic and we utilised in-depth, collaborative thematic analysis.  
28 However, despite these strengths, the paper has several limitations. We did not recruit  
29 these participants specifically to talk about the Covid-19 pandemic. Rather, the timing of the  
30 study meant that the topic arose naturally. As such, the interview guide could have been  
31 designed to ask participants more thoroughly about these experiences. Additionally, some  
32 of the junior doctors had more experience of working with COVID-19 patients than others,  
33 meaning some participants are better represented in this paper than others. Further, there  
34 is a notable gender disparity, with a higher proportion of female doctors taking part. More  
35 female (n=12) participants volunteered than males (n=3). The increased willingness of  
36 female participants to speak about their experiences may be associated with evidence  
37 indicating that female doctors are more likely to experience distress. Sadly, this group are  
38 also more likely to kill themselves [1]. The higher proportion of female participants may also  
39 reflect gendered help-seeking behaviour for mental ill-health, evidenced in the wider  
40 population [39], as well as the fact that female doctors are more likely to take part in  
41 research than their male counterparts [40]. Finally, it should be reiterated that this was a  
42 purposive sample of particularly distressed junior doctors, albeit taken from a wider sample  
43  
44  
45  
46  
47  
48  
49  
50  
51  
52  
53  
54  
55  
56  
57  
58  
59  
60

1  
2  
3 in which distress was widely reported, and so our findings are not intended to be  
4 generalised to all junior doctors.  
5  
6  
7

## 8 9 **Conclusions and recommendations**

10 We conclude that junior doctors working during the COVID-19 pandemic faced multiple  
11 stressors and used various coping mechanisms to deal with these, with greater or lesser  
12 degrees of success. Several unexpected benefits of this period arose, including new ways of  
13 working and additional support and camaraderie. We believe that the responsibility for  
14 alleviating the stress and distress of junior doctors working during times of stress lies with  
15 organisational employment issues and systemic workforce gaps, rather than with  
16 individuals. As such, we recommend system-wide changes, such as improved  
17 communication strategies, increased flexibility around home-based working, addressing the  
18 physical limitations of the working conditions many junior doctors experience and more  
19 supportive and compassionate leadership. Additionally, we suggest that, where possible,  
20 junior doctors are assigned to consistent teams, with the opportunity for appropriate  
21 psychological support where indicated.  
22  
23  
24  
25  
26  
27  
28  
29  
30  
31  
32  
33

34 **Author contributions:** RR, JS, CCG, MB, AD, KT, AG, AT, MvH, LA, JM – substantial  
35 contributions to conception and design; approval of final version to the published.  
36  
37  
38

39 RR, JS, CCG, MB, AT, KT, AD, AT – acquisition, analysis or interpretation of data; drafting the  
40 article or revising it critically for important intellectual content.  
41  
42  
43  
44

45 **Acknowledgements:** The authors would like to thank all junior doctor participants who  
46 kindly gave their time to share their experiences of working in the NHS. We also wish to  
47 thank members of the PPIE group who provided valuable input throughout the study.  
48  
49  
50  
51

52 **Data sharing:** This study has not received ethical approval to share confidential data with  
53 any third party other than the research team.  
54  
55  
56  
57  
58  
59  
60



1  
2  
3 **Ethical approval:** Ethical approval was granted by the University of Birmingham and Health  
4  
5 Research Authority (reference number: 19/HRA/6579)  
6  
7  
8  
9  
10  
11  
12  
13  
14  
15  
16  
17  
18  
19  
20  
21  
22  
23  
24  
25  
26  
27  
28  
29  
30  
31  
32  
33  
34  
35  
36  
37  
38  
39  
40  
41  
42  
43  
44  
45  
46  
47  
48  
49  
50  
51  
52  
53  
54  
55  
56  
57  
58  
59  
60

For peer review only

## References

1. Dutheil, F., et al. *Suicide among physicians and health-care workers: A systematic review and meta-analysis*. PloS one. 2019. **14**(12): p. e0226361
2. Petrie, K., et al. *Interventions to reduce symptoms of common mental disorders and suicidal ideation in physicians: A systematic review and meta-analysis*. The Lancet Psychiatry. 2019. **6**(3): 225-34.
3. Brooks, S. K., et al. *Review of literature on the mental health of doctors: Are specialist services needed?* Journal of Mental Health. 2011. **20**(2): 146-56.
4. Chopra, S. S. et al. *Physician Burnout*. JAMA. 2004. **291**(5): 633–33.
5. Cubitt, L. J. et al. *Beyond PPE: A mixed qualitative-quantitative study capturing the wider issues affecting doctors' well-being during the COVID-19 pandemic*. BMJ Open. 2021. **11**(3): e050223.
6. San Juan, N. V., et al. *Healthcare Workers' mental health and wellbeing during the COVID-19 pandemic in the UK: Contrasting guidelines with experiences in practice*. MedRxiv. 2020; advanced online.
7. Vindrola-Padros C., et al. *Perceptions and experiences of healthcare workers during the COVID-19 pandemic in the UK*. BMJ Open. 2020; **10**(11): Advanced online: e040503.
8. Liberati E., et al. *A qualitative study of experiences of NHS mental healthcare workers during the Covid-19 pandemic*. BMC Psychiatry. 2021. **21**(1): 1-12.
9. Sun, N., et al. *A qualitative study on the psychological experience of caregivers of COVID-19 patients*. American Journal of Infection Control. 2020. **48**(6): 592-8.
10. Blake, H., et al. *COVID-well study: Qualitative evaluation of supported wellbeing centres and psychological first aid for healthcare workers during the COVID-19 pandemic*. International Journal of Environmental Research and Public Health. 2021. **18**(7): 3626-59.
11. Newman K. L., et al. *Experiences and emotional strain of NHS frontline workers during the peak of the COVID-19 pandemic*. International Journal of Social Psychiatry. 2021; advanced online 00207640211006153.
12. Cawcutt K. A., et al. *Fighting fear in healthcare workers during the COVID-19 pandemic*. Infection Control & Hospital Epidemiology. 2020. **41**(10): 1192-3.
13. BMA, <https://www.bma.org.uk/advice-and-support/international-doctors/life-and-work-in-the-uk/toolkit-for-doctors-new-to-the-uk/doctors-titles-explained>. 2020.

14. Fox F. E., et al. *Junior doctors' experiences of personal illness: A qualitative study*. Medical Education. 2011. **45**(12): 1251-61.
15. Coughlan C., et al. *COVID-19: Lessons for junior doctors redeployed to critical care*. Postgraduate Medical Journal. 2021. **97**(1145): 188-91.
16. Lion P., et al. *ENT trainees' experience of redeployment during the coronavirus disease 2019 pandemic: A qualitative study*. The Journal of Laryngology & Otology, 2021. 1-13.
17. Aziz, A., et al. *Rapid transformation of the medical on-call rotas to deal with the COVID-19 pandemic: A case study*. Future Healthcare Journal. 2021; **8**(1): e36.
18. Seifman M. A., et al. *COVID-19 impact on junior doctor education and training: A scoping review*. Postgraduate medical journal. 2021.
19. Rimmer, M. P., et al. *Provision of obstetrics and gynaecology services during the COVID-19 pandemic: A survey of junior doctors in the UK National Health Service*. BJOG: An International Journal of Obstetrics & Gynaecology. 2020. **127**(9): 1123-8.
20. Riley, R., et al. *Protective factors and sources of support in the workplace as experienced by UK foundation and junior doctors: A qualitative study*. BMJ Open. 2021. **11**(6): e045588.
21. Riley, R., et al. *Sources of work-related psychological distress experienced by UK-wide foundation and junior doctors: A qualitative study*. BMJ Open. 2021. **11**(6): e043521.
22. Osman, A., et al. *The depression anxiety stress scales—21 [DASS-21]: Further examination of dimensions, scale reliability, and correlates*. Journal of clinical psychology. 2012. **68**(12): 1322–1338.
23. Paykel, E. S., et al. *Suicidal feelings in the general population: A prevalence study*. The British Journal of Psychiatry. 1974. **214**(582): 460–9.
24. King N. and C. Horrocks, *Interviews in Qualitative Research*. 2010, London: Sage.
25. Braun V. and V. Clarke, *Using thematic analysis in psychology*. Qualitative research in psychology, 2006. **3**(2): 77-101.
26. Braun V. and V. Clarke, *Reflecting on reflexive thematic analysis*. Qualitative Research in Sport, Exercise and Health, 2019. **11**(4): 589-97.
27. Johnson, S., et al. *Impact on mental health care and on mental health service users of the COVID-19 pandemic: A mixed methods survey of UK mental health care staff*. Social Psychiatry and Psychiatric Epidemiology, 2021. **56**(1): 25-37.

- 1  
2  
3 28. Tallentire VR, Smith SE, Facey AD, Rotstein L. Exploring newly qualified doctors'  
4 workplace stressors: an interview study from Australia. *BMJ Open*. 2017;7(8):e015890.
- 5  
6 29. Amofo, E., et al. *What are the significant factors associated with burnout in*  
7 *doctors?* *Occupational Medicine*, 2015; **65**(2): 117-21.
- 8  
9 30. Owens, J., Singh, G., & Cribb, A. (2019). Austerity and professionalism: being a good  
10 healthcare professional in bad conditions. *Health Care Analysis*, 27(3), 157-170.
- 11  
12 31. Kinman G. and K. Teoh K, *What could make a difference to the mental health of UK*  
13 *doctors? A review of the research evidence*. 2018.
- 14  
15 32. Kinman, G., et al. *The mental health and wellbeing of nurses and midwives in the*  
16 *United Kingdom*. Royal College of Nursing Foundation and the Society for Occupational  
17 Medicine, 2020.
- 18  
19 33. Oliver, D., *The NHS's understaffing is its Achilles' heel*. *BMJ: British Medical Journal*  
20 (Online), 2017. 357.
- 21  
22 34. Boorman, S. *NHS Health and well-being review: Interim report*. NHS Health and  
23 Wellbeing Review, 2009.
- 24  
25 35. Joseph, J., *Resilience as embedded neoliberalism: A governmentality approach*.  
26 *Resilience*, 2013. **1**(1): 38-52.
- 27  
28 36. Traynor, M. *Guest editorial: What's wrong with resilience*. *Journal of Research in*  
29 *Nursing*, 2018. **23**(1): 5-8.
- 30  
31 37. Pollock, A., et al. *Interventions to support the resilience and mental health of*  
32 *frontline health and social care professionals during and after a disease outbreak, epidemic*  
33 *or pandemic: A mixed methods systematic review*. *Cochrane Database of Systematic*  
34 *Reviews*, 2020. 11.
- 35  
36 38. Sood, A., et al. *Stress management and resilience training among department of*  
37 *medicine faculty: A pilot randomized clinical trial*. *Journal of general internal medicine*, 2011.  
38 **26**(8): 858-61.
- 39  
40 39. Seidler, Z. E., et al. *The role of masculinity in men's help-seeking for depression: A*  
41 *systematic review*. *Clinical Psychology Review*, 2016. **49**: 106-18.
- 42  
43 40. Cull, W. L., et al. *Response rates and response bias for 50 surveys of pediatricians*.  
44 *Health Services Research*, 2005. **40**(1): 213-26.
- 45  
46  
47  
48  
49  
50  
51  
52  
53  
54  
55  
56  
57  
58  
59  
60

Consolidated criteria for reporting qualitative studies [COREQ]:

Developed from: Tong, A., Sainsbury, P., & Craig, J. [2007]. Consolidated criteria for reporting qualitative research [COREQ]: a 32-item checklist for interviews and focus groups. *International journal for quality in health care*, 19[6], 349-357.

| No. Item                                       | Guide questions/description                                                                                                                              | Reported on page # |
|------------------------------------------------|----------------------------------------------------------------------------------------------------------------------------------------------------------|--------------------|
| <b>Domain 1: Research team and reflexivity</b> |                                                                                                                                                          |                    |
| <i>Personal characteristics</i>                |                                                                                                                                                          |                    |
| 1. Interviewer/facilitator                     | Which author/s conducted the interview or focus group?                                                                                                   | Page 11            |
| 2. Credentials                                 | What were the researcher's credentials? E.g. PhD, MD.                                                                                                    | Page 11            |
| 3. Occupation                                  | What was their occupation at the time of the study?                                                                                                      | Page 11            |
| 4. Gender                                      | Was the researcher male or female?                                                                                                                       | Page 11            |
| 5. Experience and training                     | What experience or training did the researcher have?                                                                                                     | Page 11            |
| <i>Relationship with participants</i>          |                                                                                                                                                          |                    |
| 6. Relationship established                    | Was a relationship established prior to study commencement?                                                                                              | Page 11            |
| 7. Participant knowledge of interviewer        | What did the participant know about the researcher? E.g. personal goals, reasons for doing the research.                                                 | Page 11            |
| 8. Interviewer characteristics                 | What characteristics were reported about the interviewer/facilitator? E.g. bias, assumptions, reasons and interests in the research topic                | Page 12            |
| <b>Domain 2: study design</b>                  |                                                                                                                                                          |                    |
| <i>Theoretical framework</i>                   |                                                                                                                                                          |                    |
| 9. Methodological orientation and theory       | What methodological orientation was stated to underpin the study? E.g. grounded theory, discourse analysis, ethnography, phenomenology, content analysis | Page 12            |

|                                        |                                                                                    |                              |
|----------------------------------------|------------------------------------------------------------------------------------|------------------------------|
| <i>Participant sampling</i>            |                                                                                    |                              |
| 10. Sampling                           | How were participants selected? E.g. purposive, convenience, consecutive, snowball | Page 10                      |
| 11. Method of approach                 | How were participants approached? E.g. face-to-face, telephone, mail, email        | Page 10                      |
| 12. Sample size                        | How many participants were in the study?                                           | Page 11                      |
| 13. Non-participation                  | How many people refused to participate or dropped out? Reasons?                    | None                         |
| <i>Setting</i>                         |                                                                                    |                              |
| 14. Setting of data collection         | Where was the data collected? E.g. home, clinic, workplace                         | Page 11                      |
| 15. Presence of non-participants       | Was anyone else present besides the participants and the researchers?              | No                           |
| 16. Description of the sample          | What were the important characteristics of the sample? E.g. demographic data, date | Page 11                      |
| <i>Data collection</i>                 |                                                                                    |                              |
| 17. Interview guide                    | Were questions, prompts, guides provided by the authors? Was it pilot tested?      | Page 11                      |
| 18. Repeat interviews                  | Were repeat interviews carried out? If yes, how many?                              | No                           |
| 19. Audio/visual recording             | Did the research use audio or visual recording to collect the data?                | Page 11                      |
| 20. Field notes                        | Were field notes made during and/or after the interview or focus group?            | Page 11                      |
| 21. Duration                           | What was the duration of the interviews or focus group?                            | Page 11                      |
| 22. Data saturation                    | Was data saturation discussed?                                                     | Page 12                      |
| 23. Transcripts returned               | Were transcripts return to participants for comment and/or correction?             | No, due to lack of resources |
| <b>Domain 3: analysis and findings</b> |                                                                                    |                              |
| <i>Data analysis</i>                   |                                                                                    |                              |
| 24. Number of data coders              | How many data coders coded the data?                                               | Page 12                      |
| 25. Description of the coding tree     | Did authors provide a description of the coding tree?                              | No                           |
| 26. Derivation of themes               | Derived from the data?                                                             | Page 12                      |

|                                  |                                                                                                                                 |                              |
|----------------------------------|---------------------------------------------------------------------------------------------------------------------------------|------------------------------|
| 27. Software                     | What software, if applicable, was used to manage the data?                                                                      | Page 12                      |
| 28. Participant checking         | Did participants provide feedback on the findings?                                                                              | No, due to lack of resources |
| <i>Reporting</i>                 |                                                                                                                                 |                              |
| 29. Quotations presented         | Were participant quotations presented to illustrate the themes/findings? Was each quotation identified? E.g. participant number | Pages 13-22                  |
| 30. Data and findings consistent | Was there consistency between the data presented and the findings                                                               | Yes, see sages 13-22         |
| 31. Clarity of major themes      | Were major themes presented in the findings?                                                                                    | Yes                          |
| 32. Clarity of minor themes      | Is there a description of diverse cases or discussion of minor themes?                                                          | Yes                          |

# BMJ Open

## What challenges did junior doctors face whilst working during the COVID-19 pandemic? A qualitative study

|                                 |                                                                                                                                                                                                                                                                                                                                                                                                                                                                                                                                                                                                                                                                                                                                                                                                                       |
|---------------------------------|-----------------------------------------------------------------------------------------------------------------------------------------------------------------------------------------------------------------------------------------------------------------------------------------------------------------------------------------------------------------------------------------------------------------------------------------------------------------------------------------------------------------------------------------------------------------------------------------------------------------------------------------------------------------------------------------------------------------------------------------------------------------------------------------------------------------------|
| Journal:                        | <i>BMJ Open</i>                                                                                                                                                                                                                                                                                                                                                                                                                                                                                                                                                                                                                                                                                                                                                                                                       |
| Manuscript ID                   | bmjopen-2021-056122.R2                                                                                                                                                                                                                                                                                                                                                                                                                                                                                                                                                                                                                                                                                                                                                                                                |
| Article Type:                   | Original research                                                                                                                                                                                                                                                                                                                                                                                                                                                                                                                                                                                                                                                                                                                                                                                                     |
| Date Submitted by the Author:   | 11-Nov-2021                                                                                                                                                                                                                                                                                                                                                                                                                                                                                                                                                                                                                                                                                                                                                                                                           |
| Complete List of Authors:       | Spiers, Johanna; University of Birmingham, College of Medical and Dental Sciences<br>Buszewicz, Marta; University College London, Research Department of Primary Care and Population Health<br>Chew-Graham, Carolyn; University of Keele<br>Dunning, Alice; Bradford Teaching Hospitals NHS Foundation Trust<br>Taylor, Anna; University of Leeds<br>Gopfert, Anya; Torbay Council<br>Van Hove, Maria; University of Exeter<br>Teoh, Kevin; Birkbeck University of London, Department of Organizational Psychology<br>Appleby, Louis; University of Manchester, Psychiatry & Behavioral Sciences<br>Martin, James; University of Birmingham, Institute of Applied Health Research<br>Riley, Ruth; University of Birmingham Institute of Applied Health Research; University of Birmingham, of Applied Health Research |
| <b>Primary Subject Heading</b>: | Mental health                                                                                                                                                                                                                                                                                                                                                                                                                                                                                                                                                                                                                                                                                                                                                                                                         |
| Secondary Subject Heading:      | Health services research, Medical education and training, Qualitative research                                                                                                                                                                                                                                                                                                                                                                                                                                                                                                                                                                                                                                                                                                                                        |
| Keywords:                       | COVID-19, MENTAL HEALTH, Depression & mood disorders < PSYCHIATRY, QUALITATIVE RESEARCH                                                                                                                                                                                                                                                                                                                                                                                                                                                                                                                                                                                                                                                                                                                               |
|                                 |                                                                                                                                                                                                                                                                                                                                                                                                                                                                                                                                                                                                                                                                                                                                                                                                                       |

SCHOLARONE™  
Manuscripts





I, the Submitting Author has the right to grant and does grant on behalf of all authors of the Work (as defined in the below author licence), an exclusive licence and/or a non-exclusive licence for contributions from authors who are: i) UK Crown employees; ii) where BMJ has agreed a CC-BY licence shall apply, and/or iii) in accordance with the terms applicable for US Federal Government officers or employees acting as part of their official duties; on a worldwide, perpetual, irrevocable, royalty-free basis to BMJ Publishing Group Ltd ("BMJ") its licensees and where the relevant Journal is co-owned by BMJ to the co-owners of the Journal, to publish the Work in this journal and any other BMJ products and to exploit all rights, as set out in our [licence](#).

The Submitting Author accepts and understands that any supply made under these terms is made by BMJ to the Submitting Author unless you are acting as an employee on behalf of your employer or a postgraduate student of an affiliated institution which is paying any applicable article publishing charge ("APC") for Open Access articles. Where the Submitting Author wishes to make the Work available on an Open Access basis (and intends to pay the relevant APC), the terms of reuse of such Open Access shall be governed by a Creative Commons licence – details of these licences and which [Creative Commons](#) licence will apply to this Work are set out in our licence referred to above.

Other than as permitted in any relevant BMJ Author's Self Archiving Policies, I confirm this Work has not been accepted for publication elsewhere, is not being considered for publication elsewhere and does not duplicate material already published. I confirm all authors consent to publication of this Work and authorise the granting of this licence.

1  
2  
3  
4  
5  
6  
7  
8  
9  
10  
11  
12  
13  
14  
15  
16  
17  
18  
19  
20  
21  
22  
23  
24  
25  
26  
27  
28  
29  
30  
31  
32  
33  
34  
35  
36  
37  
38  
39  
40  
41  
42  
43  
44  
45  
46  
47  
48  
49  
50  
51  
52  
53  
54  
55  
56  
57  
58  
59  
60

# What challenges did junior doctors face whilst working during the COVID-19 pandemic? A qualitative study

**Johanna Spiers** (corresponding author)

Institute of Applied Health Research

University of Birmingham

Birmingham

United Kingdom

johanna.spiers@gmail.com

Tel: 07966 763 364

**Marta Buszewicz**

Research Department of Primary Care and Population Health

University College London Medical School

London

United Kingdom

**Carolyn A. Chew-Graham**

School of Medicine

Keele University

Keele

United Kingdom

**Alice Dunning**

Yorkshire Quality and Safety Research Group

Bradford Institute for Health research

Bradford Teaching Hospitals NHS Foundation Trust

Bradford

United Kingdom

**Anna K. Taylor**

Leeds Institute of Health Sciences  
Faculty of Medicine and Health  
University of Leeds  
Leeds  
United Kingdom

**Anya Gopfert**

Torbay Council,  
Torquay,  
TQ1 3DR

**Maria van Hove**

The University of Exeter,  
Exeter,  
EX4 4PY

**Kevin Rui-Han Teoh**

Department of Organizational Psychology  
Birkbeck, University of London  
London  
United Kingdom

**Louis Appleby**

Division of Psychology and Mental Health  
School of Medicine  
University of Manchester  
Manchester  
United Kingdom

**James Martin**

1  
2  
3 Institute of Applied Health Research  
4  
5 University of Birmingham  
6  
7 Birmingham  
8  
9 United Kingdom  
10

11  
12 **Ruth Riley**

13  
14 Institute of Applied Health Research  
15  
16 University of Birmingham  
17  
18 Birmingham  
19  
20 United Kingdom  
21

22  
23  
24  
25 Keywords: Junior doctors, COVID-19, Occupational Stress, Mental Health, Working  
26  
27 Conditions, Qualitative Methods  
28  
29  
30  
31  
32  
33  
34  
35  
36  
37  
38  
39  
40  
41  
42  
43  
44  
45  
46  
47  
48  
49  
50  
51  
52  
53  
54  
55  
56  
57  
58  
59  
60

# What challenges did junior doctors face whilst working during the COVID-19 pandemic? A qualitative study

## Abstract

**Objectives:** This paper reports findings exploring junior doctors' experiences of working during the COVID-19 pandemic in the UK.

**Design:** Qualitative study using in-depth interviews with 15 junior doctors. Interviews were audio-recorded, transcribed, anonymised and imported into NVivo 12 to facilitate data management. Data were analysed using reflexive thematic analysis.

**Setting:** NHS England.

**Participants:** A purposive sample of 12 female and three male junior doctors who indicated severe depression and/or anxiety on the DASS-21 questionnaire or high suicidality on Paykel's measure were recruited. These doctors self-identified as having lived experience of distress due to their working conditions.

**Results:** We report three major themes. Firstly, the challenges of working during the COVID-19 pandemic, which were both personal and organisational. Personal challenges were characterised by helplessness and included the trauma of seeing many patients dying, fears about safety and being powerless to switch off. Work-related challenges revolved around change and uncertainty, and included increasing workloads, decreasing staff numbers and negative impacts on relationships with colleagues and patients. The second theme was strategies for coping with the impact of COVID-19 on work, which were also both personal and organisational. Personal coping strategies, which appeared limited in their usefulness, were problem and emotion-focused. Several participants appeared to have moved from coping towards learned helplessness. Some organisations reacted to COVID-19 collaboratively and flexibly. Thirdly, participants reported a positive impact of the COVID-19

1  
2  
3 pandemic on working practices, which included simplified new ways of working – such as  
4 consistent teams and longer rotations – as well as increased camaraderie and support.  
5  
6  
7

8  
9 Conclusions The trauma that junior doctors experienced whilst working during Covid-19 led  
10 to powerlessness and a reduction in the benefit of individual coping strategies. This may  
11 have resulted in feelings of resignation. We recommend that, post-pandemic, junior doctors  
12 are assigned to consistent teams and offered ongoing support.  
13  
14  
15  
16

### 17 18 Article summary: Strengths and limitations

- 19  
20  
21 • Participants were interviewed at the peak of the second wave of COVID-19 during  
22 the UK, meaning transcripts contain data that are highly relevant to the research  
23 question  
24
- 25  
26 • In-depth, reflexive thematic analysis was carried out on the data, leading to the  
27 development of rich, insightful themes  
28
- 29  
30 • Female participants outnumbered male participants in this study, potentially leading  
31 to gender imbalance  
32
- 33  
34 • Additionally, the wider study was not initially designed to explore experiences of  
35 working during COVID-19. Instead, participants naturally discussed this topic during  
36 interviews.  
37  
38  
39  
40

### 41 42 Funding statement

43  
44  
45 The study was funded by NIHR Research for Patient Benefit (grant number PB-PG-0418-  
46 20023). Please note that CCG is part-funded by West Midlands ARC.  
47  
48  
49

### 50 51 Competing interests

52  
53  
54 None  
55  
56  
57  
58  
59  
60

## Introduction

Doctors are more vulnerable to mental illnesses [such as anxiety and depression] and suicide than the general population [1, 2]. In recent years, including those before the COVID-19 pandemic, UK doctors have reported understaffing, stretched resources, increased workload and burnout [3-7].

There is an additional need to attend to frontline workers' wellbeing during health crises [6-8]. Frontline workers caring for COVID-19 patients have reported stress and distress due to the strain on healthcare systems [9]. Such stressors include the need for rapid training around treating a new illness [9] and the psychological impact of exposure to unprecedented levels of suffering and COVID-19-related deaths, both of patients and colleagues [8, 10, 11].

These stressors led to healthcare professionals (HCP) reporting fears about contracting or spreading the virus as well as uncertainty due to new ways of working [11, 12]. Impacts of these fears and stressors include reduced sleep, self-harm, panic attacks, guilt, relationship breakdowns [11], concerns about lack of training [7] and psychological trauma [10].

The UK reported some of the highest numbers of COVID-19 cases in Europe [7]. In a recent paper, almost half of the 224 UK doctors surveyed (from junior doctors to consultants) felt that their mental health had been harmed by the pandemic, while a third reported impacts to their physical health [5]. Increased healthcare worker burnout is, therefore, a major concern at this time. We need a holistic understanding of the experiences and needs of frontline workers to mitigate psychological distress and burnout [11].

'Junior doctor' is the term given to qualified doctors who are still in training whilst working. They may have eight or more years of experience, depending on their speciality [13]. Junior doctors have reported fears that they will 'fail' or appear 'weak' if they take time off sick, making it harder for them to report mental health concerns [14]. This group faced unique challenges during COVID-19 due to uncertainties about exams [6], potential redeployment [8, 15, 16] and concerns about their learning opportunities [15, 16]. UK junior doctors have

1  
2  
3 reported that they did not receive enough education before treating COVID-19 patients  
4 [15]. They were also often faced with the difficult task of contacting patients' families to  
5 provide updates, since relatives were typically not permitted to visit [15].  
6  
7  
8  
9

10 Despite this, few researchers have looked in-depth at the psychological experiences of  
11 junior doctors. Instead, they have explored practical matters relating to this group, such as  
12 the resilience of new rotas (that is, assigning enough staff to cope with the workload) [17],  
13 redeployment [15, 16], the impact on training [18] and the provision of certain services such  
14 as obs and gynae [19].  
15  
16  
17  
18  
19

20  
21 Researchers have posited the need for more in-depth qualitative analysis in this area [5, 11].  
22 This paper is part of a wider study [20, 21] designed to explore the impact of working  
23 conditions and cultures on junior doctors in general. Data collection coincided with the  
24 second wave of the pandemic in the UK, meaning the topic naturally arose for all 15  
25 participants interviewed. As such, we aim to address this crucial gap in the literature and  
26 reflect the experiences of junior doctors working within the context of COVID-19.  
27  
28  
29  
30  
31  
32  
33

## 34 Method

### 35 Study design and setting

36 This qualitative study is part of a larger mixed-methods study exploring junior doctors'  
37 perceptions of stress and distress. Semi-structured interviews were used to explore junior  
38 doctors' experiences of working during COVID-19. The study setting was the NHS in England.  
39  
40  
41  
42  
43  
44  
45

### 46 Sampling and recruitment

47 A total of 456 junior doctors were initially recruited for an online survey exploring working  
48 cultures, psychological distress and suicidality between November 2020 and March 2021.  
49 They self-identified as participants, accessing the survey through posts on social media,  
50 junior doctor forums and via emails sent from their speciality schools. Survey participants  
51 whose results indicated severe depression and/or anxiety on the DASS-21 questionnaire  
52 [22] or high suicidality on Paykel's measure [23] were contacted via email to ask if they  
53 would like to take part in an in-depth, qualitative survey. As such, it should be noted that, in  
54  
55  
56  
57  
58  
59  
60



1  
2  
3 line with our qualitative methodology, this was a small, purposive sample of junior doctors  
4 who were experiencing stress and distress as a result of their working conditions. Thus,  
5 findings cannot be generalised to all junior doctors. However, it should also be noted that  
6 levels of distress were high in the whole sample of surveyed junior doctors. A total of 27  
7 potential participants were contacted, of which 15 were female, nine male, three  
8 undisclosed.  
9  
10  
11  
12  
13  
14  
15

16 Interested individuals contacted JS and gave informed consent. Participants were given the  
17 chance to ask JS questions about the research team and the study before interviews went  
18 ahead. Fifteen junior doctors (12 female, three male) were recruited.  
19  
20  
21  
22

### 23 Data collection

24 A semi-structured interview guide was developed by the research team and modified  
25 iteratively as data collection and analysis progressed. This guide aimed to capture  
26 participants' views, experiences, feelings and beliefs about working conditions and cultures  
27 which were perceived as stressful or distressing. The guide was informed by the existing  
28 literature [1, 3, 14], input from junior doctors on the study team as well as patient and  
29 public involvement (PPI) consultation exercises conducted before obtaining funding.  
30 Following conventions for semi-structured interviews [24], points from the topic guide were  
31 followed up with individualised questions exploring topics of interest and importance for  
32 each participant.  
33  
34  
35  
36  
37  
38  
39  
40  
41  
42  
43

44 Interviews were conducted either on the telephone or via video call, from participants'  
45 homes or places of work. They took place between December 2020 and February 2021 –  
46 that is, during the second wave of the COVID-19 pandemic in the UK – and at a date and  
47 time that were convenient to the participants. A risk protocol was used to ensure that  
48 appropriate support from two senior GPs who were on the study team and/or Practitioner  
49 Health would be provided to participants in the event of the disclosure of suicidal ideation.  
50 The in-depth interviews were conducted by JS, a female PhD psychologist with extensive  
51 qualitative methods expertise. JS also recorded any pertinent observations in field notes  
52 following each interview. Interviews ranged from 29 minutes to 102 minutes in length  
53 (mean = 62.8 minutes).  
54  
55  
56  
57  
58  
59  
60

1  
2  
3  
4  
5 The audio-recorded interviews were transcribed verbatim and checked for accuracy by JS  
6 before analysis. All transcripts were anonymised before discussion within the wider  
7 research team. Reflexive notes were recorded by researchers throughout the process.  
8  
9

### 10 11 12 Patient and public involvement and engagement

13  
14 There are three junior doctors on the research team, all of whom consulted with other  
15 colleagues in the PPI team about the initial research idea and participated in analysis  
16 meetings. Five junior doctors gave feedback on the initial funding application, while four fed  
17 back on the protocol, topic guide and participant-facing documents.  
18  
19  
20  
21  
22

### 23 24 Data analysis

25  
26 Data were analysed by JS using reflexive thematic analysis [25, 26], in which themes  
27 highlight patterns of shared meaning united by a core concept. An inductive, explicit, critical  
28 realist approach was adopted since this was in line with the researchers' desire for a rich,  
29 data-driven analysis which demonstrated the interplay between events and participants'  
30 interpretations of those events [25]. Data saturation is not a relevant concept within this  
31 type of approach, in which it is accepted that each new participant adds fresh insights.  
32  
33 Analysis began once all interviews had been conducted. Transcripts were analysed one by  
34 one using NVivo 12. As analysis progressed, a table of themes was generated and refined.  
35  
36 Each new transcript led to new codes and themes being added or expanded. In addition,  
37  
38 four members of the team, one of whom was a junior doctor and two of whom were  
39  
40 academic GPs (RR, MB, AT, CCG), read and fed back on six of the 15 interviews. Their views  
41  
42 and insights were collaboratively incorporated into the NVivo codes. JS then refined these  
43  
44 codes to create relevant tables of themes once all interviews had been analysed and  
45  
46 discussed. Analysis continued and deepened during the write-up, where shared meanings  
47  
48 were generated and described for each theme [26].  
49  
50  
51  
52  
53  
54

### 55 56 Reflexivity

57 RR, the study PI, is epistemologically steeped in qualitative traditions underpinned by  
58 interpretivism and phenomenology, and is oriented by critical theory such as feminism. This  
59  
60

1  
2  
3 is likely to have influenced her interest in exploring why female doctors are more likely to  
4 experience distress.  
5  
6  
7

8 JS, the lead analyst on this paper, is a qualitative health psychologist. She has an interest in  
9 in-depth, interpretative methods. She is white, cis-gendered, heterosexual and able-bodied.  
10 This heteronormative positioning is likely to have impacted her interviewing and analysis.  
11  
12  
13  
14

15  
16 Both researchers have an interest in the systemic issues impacting individual NHS workers  
17 and are motivated by trying to find organisational – rather than individual – solutions for  
18 those workers.  
19  
20  
21  
22

23 The junior doctor (AT) and academic GPs (MB and CCG) who also contributed to analysis of  
24 the data have experienced and observed events during their professional lives which may  
25 have influenced how strongly they interpreted the data. Additionally, MB and CCG have a  
26 strong interest in mental health.  
27  
28  
29  
30  
31

### 32 Findings

33 All fifteen participants discussed the impact of COVID-19 on their working conditions.  
34 Findings divided into three major themes: Challenges of working during the COVID-19  
35 pandemic; Strategies for coping with the impact of COVID-19 on work; Positive impact of  
36 the COVID-19 pandemic on working practices.  
37  
38  
39  
40  
41  
42  
43

44 See Table One for an overview of all relevant themes and subthemes.  
45  
46  
47  
48  
49  
50  
51  
52  
53  
54  
55  
56  
57  
58  
59  
60

| Theme                                                                                                                                                                                             | Subtheme                                                                                                                                          |
|---------------------------------------------------------------------------------------------------------------------------------------------------------------------------------------------------|---------------------------------------------------------------------------------------------------------------------------------------------------|
| <p>Challenges of working during the Covid-19 pandemic<br/> <i>"patients were just dying in front of us so quickly and they were young" (P5)</i></p>                                               | <p>Personal impact: Helplessness in the face of trauma<br/> <i>"my sleep is awful again, I'm waking up, I think COVID hasn't helped" (P1)</i></p> |
|                                                                                                                                                                                                   | <p>Work-related impact: Change and uncertainty<br/> <i>"I gained 14 new patients who I'd not met before" (P6)</i></p>                             |
| <p>Strategies for coping with the impact of Covid-19 on work<br/> <i>"So although I should have moved on from GP I ended up staying in GP so I was actually there for eight months." (P7)</i></p> | <p>Limitations of personal strategies<br/> <i>"I cried a lot" (P14)</i></p>                                                                       |
|                                                                                                                                                                                                   | <p>Organisational strategies<br/> <i>"we'd kind of share what we've learned" (P5)</i></p>                                                         |
| <p>Positive impact of Covid-19 on working practices<br/> <i>"since COVID, things have improved slightly there's, um we have something called like the rest and recuperation hub." (P6)</i></p>    | <p>Positive new ways of working<br/> <i>"We almost looked forward to going to work" (P8)</i></p>                                                  |
|                                                                                                                                                                                                   | <p>Additional support and camaraderie<br/> <i>"they provided hot meals" (P5)</i></p>                                                              |

**Table one: Table of themes for junior doctors' experience of working during the Covid-19 pandemic**

### Challenges of working during the COVID-19 pandemic

Participants described challenges related to their work as junior doctors during the COVID-19 pandemic. Challenges were personal or work-related.

#### *Personal impact: Helplessness in the face of trauma*

Working as junior doctors during the COVID-19 pandemic affected participants' mental health. Throughout this theme, there is a sense that participants felt helpless and powerless as they strove to carry out their jobs in such unmapped territories.

One participant described the harmful impact of being exposed to death and suffering:

*I'd seen [pause] a whole ward just emptied out and then refilled overnight, after people had just died. It was horrendous. Uh, I was like, "I need to talk to somebody about this or I'm just going to go home and cry". (P5, female)*

This participant's language – 'emptied out' and 'refilled' – suggests that the COVID-19 patients had become dehumanised for her; a mass of unwell bodies who were dying and being replaced in an almost mechanical manner. She was helpless to stop this flow of nameless bodies.

Participants felt helpless in the face of fears for their own safety and that of their loved ones. Initially, they were unsure of how to protect themselves or of the risk they might pose to their families:

*...we had someone that we thought was, um, COVID, but it was very, very early on. And I remember being told off for wearing a mask. (P3, female)*

*...we were worried about if we were taking home our clothes, if we were making other people sick, if we would get sick, it was an incredibly stressful working environment. (P5, female)*

1  
2  
3 As time went on, fears for personal safety came from different sources, with one participant  
4 reporting that her colleagues were not maintaining safety standards. However, as a junior  
5 doctor, she felt powerless to ask for this to change:  
6  
7  
8  
9

10 *It's not patients, it's staff. I find that really stressful. Like you walk past an office and*  
11 *there might be two or three people sat in an office having a chat, all with their masks*  
12 *under their chin. [...] I don't feel confident enough to knock on the window and be like*  
13 *guys, what are you doing? But I know that them doing it puts me more at risk and puts*  
14 *the patients at risk. [...] You see stuff being wrong and you're like every day, like*  
15 *multiple times a day you're like do I say something, do I not say something? And you*  
16 *feel bad for not saying something. (P10, female)*  
17  
18  
19  
20  
21  
22  
23  
24

25 This description of discomfort could be defined as moral injury; that is, the distress that  
26 occurs when a person witnesses or carries out an act that is contrary to their values. The  
27 participant felt uncomfortable and helpless however she responded.  
28  
29  
30  
31

32 Participants were powerless to switch off or rest when they got home from work:  
33  
34  
35

36 *You couldn't switch off, you never felt like you'd had, uh, done a good job. (P5, female)*  
37  
38  
39  
40 *...my sleep is awful again, I'm waking up, I think COVID hasn't helped with these sort of*  
41 *flashbacks. (P1, female)*  
42  
43  
44

45 Participants did not feel clinically supported in the new working environment caused by  
46 COVID-19, which led to further helplessness, fear and trauma. The lack of support could be  
47 practical:  
48  
49  
50  
51

52 *I'm going to personally take responsibility for changing [...] the big scary machine that*  
53 *I'm not trained in, and, uh, figure out how it works, whilst the patient is there trying to*  
54 *physically die in front of me, but so are five others, so oh well, no help is coming. (P5,*  
55 *female)*  
56  
57  
58  
59  
60

1  
2  
3 Some felt unsupported psychologically, with one participant appearing to feel that her  
4 needs were invisible to those who might support her:  
5  
6  
7

8  
9 *...they got some psychologists who would be available and very occasionally they*  
10 *would come on the ward. [pause] And they would talk to the nurses. And that was it.*  
11 *No. It felt assumed to be on the nurses and people working in ITU and just ordinary*  
12 *junior doctors didn't [pause] didn't seem to matter. (P14, female)*  
13  
14  
15  
16

17  
18 Another felt unsupported in terms of her physical health; her safety was compromised,  
19 meaning she was unable to protect herself:  
20  
21  
22

23 *...you will turn up on a ward and you will find out halfway through handover that*  
24 *they've had a positive case over the weekend. (P10, female)*  
25  
26  
27  
28

29 Additionally, a junior doctor whose family were overseas reported feeling unsupported by  
30 her hospital after contracting COVID-19:  
31  
32  
33

34 *...when I went to quarantine, I realised that no-one actually cares about you from the*  
35 *hospital? [...] No-one called me! [...] When I was very very sick, imagine that, if I had, if*  
36 *I had literally no-one. (P4, female)*  
37  
38  
39  
40  
41

#### 42 *Work-related impact: Change and uncertainty*

43  
44

45 The work-related impact of working during a COVID-19 context centred around uncertainty  
46 and change. These included changes to workload, staffing levels, relationships with  
47 colleagues and patients, lack of support and uncertainty around new ways of working.  
48  
49  
50  
51

52 The junior doctors' workload grew significantly when COVID-19 hit, leading to further  
53 stressors. This led to a huge and stressful increase in one participant's responsibilities:  
54  
55  
56  
57  
58  
59  
60

1  
2  
3 *...on a Friday in the middle of the day when there was no consultant around [...] I*  
4 *gained 14 new patients who I'd not met before [...] that was a really stressful day. (P6,*  
5 *female)*  
6  
7  
8  
9

10 Workload increased out of hours as well, as participants were constantly having to learn  
11 new facts about the virus and its management. The quote below demonstrates the doubt  
12 and pressure felt whilst trying to learn in the face of unmanageable amounts of new  
13 information:  
14  
15  
16  
17

18  
19  
20 *So we were getting 20 emails a day, and every single one would have a red flag saying*  
21 *“vital, important, must read”, and you’d worry you’d missed something [...] there's so*  
22 *much information, it was constant, and you couldn't switch off, because it would*  
23 *impact your job. (P5, female)*  
24  
25  
26  
27

28  
29 As workload rose, staffing levels, which had already been stretched, were adversely affected  
30 by further staff reductions due to illness or the need to self-isolate, demonstrating  
31 additional change and uncertainty:  
32  
33  
34

35  
36 *So it's very very short-staffed because a lot of the people are self-isolating, ill with*  
37 *COVID, or just because you know they've worked already five or six days in a row, and*  
38 *obviously they're quite tired and they have to take a break. (P12, male)*  
39  
40  
41  
42

43 The additional workload changed working relationships in various ways. Participants  
44 reported that colleagues became irritable or verbally aggressive due to increased stress:  
45  
46  
47

48  
49 *I think everyone got a little bit more [pause], um, maybe snippy? With each other?*  
50 *'Cause we were all are very stressed and anxious. (P3, female)*  
51  
52  
53  
54  
55  
56  
57  
58  
59  
60



1  
2  
3 *...a registrar wearing an MF53 mask<sup>1</sup> and the consultant laying into him basically*  
4 *shouting at him that [...] he was depriving someone else who actually needed this*  
5 *mask [...] emotions were running high because people were scared. (P14, female)*  
6  
7  
8  
9

10 One trainee, based in general practice, reported that patients had become abusive during  
11 telephone appointments, potentially dehumanising their doctors:  
12  
13  
14

15  
16 *...sometimes people lose sense of the fact that it's another human being on the end of*  
17 *the phone with them. And you're already dehumanised a little bit as a doctor because*  
18 *people expect you to be more than, more than human. And when you then couple that*  
19 *with someone just being this kind of like faceless voice on the end of the phone,*  
20 *especially when people are scared or something like that, it just there's that*  
21 *heightened level of aggression. (P7, female)*  
22  
23  
24  
25  
26  
27  
28

29 That participant also reported finding the change to telephone appointments clinically  
30 challenging and risky in terms of being able to diagnose patients accurately.  
31  
32  
33

34 *I don't think you realise how much you rely on seeing someone in front of you to know*  
35 *how well they are. And talking to someone over the phone it just feels a lot more*  
36 *dangerous. (P7, female)*  
37  
38  
39  
40  
41

42 Compounding these changes which made participants' working lives harder was the fact  
43 that it also became harder to speak with and get support from peers due to the safety  
44 measures:  
45  
46  
47  
48

49 *Um, and now with COVID where you're only allowed, like, two people in each room, it,*  
50 *it's very difficult to, um, socialise and talk. (P8, female)*  
51  
52  
53  
54

55 As junior doctors in training, participants also found the uncertainty around changes to  
56 rotas and exams challenging:  
57  
58  
59

---

60 <sup>1</sup> This is a full face, military style of mask

1  
2  
3  
4  
5 *...a fair amount of uncertainty and the problem this time is that, ah, a lot of courses*  
6 *are still going ahead, exams are still going ahead, but we've been moved onto*  
7 *emergency rotas with a week's notice. (P8, female)*  
8  
9

10  
11  
12 The junior doctors were often expected to work in different specialities or locations from  
13 those which they had been allocated to pre-pandemic. Constant anxiety due to uncertainty  
14 about redeployment was reported:  
15  
16

17  
18  
19  
20 *...anxious and uncertain about whether that was going to happen and*  
21 *would sort of check my emails pretty consistently to see whether that was*  
22 *actually whether that was going to be um delayed or stopped because of*  
23 *COVID redeployment. (P6, female)*  
24  
25  
26  
27  
28  
29

30 The pandemic meant that new ways of working were quickly developed and implemented.  
31 Trying to adjust to these changes was another challenge. One trainee in psychiatry talked  
32 about the potential stress and impact on patient care of working from home:  
33  
34  
35

36  
37 *...you've not got those people around you to bounce things off, so you might get an*  
38 *email and it might be quite an anxiety-inducing email because it might say someone's*  
39 *suicidal, you need to see them, and you're thinking, oh, I can't see them, erm, and*  
40 *normally, kind of in an office you'd just be able to ask, can anyone else see them? (P2,*  
41 *female)*  
42  
43  
44  
45  
46  
47  
48

#### 49 Strategies for coping with the impact of COVID-19 on work

50

51  
52 Participants described both personal and organisational strategies for coping with the above  
53 challenges.  
54  
55  
56  
57  
58  
59  
60

### *Inadequate personal coping strategies*

Emotion-focused and problem-focused coping strategies were utilised for dealing with the challenges of COVID-19. However, there was a sense that these personal coping strategies, which might have been adequate before COVID-19, were not enough to protect participants from the impact of working during the pandemic.

Emotion-based coping strategies included crying:

*So I cried a lot outside. Because it was getting warmer so you could go outside. Hug a tree, cry. (P14, female)*

Stoicism was used by some, although this latter strategy suggested a sense of resignation, illustrated by P8's rhetorical and hopeless question:

*And [pause] and in a way it didn't really matter that our rota changed, because there was nothing else to do? (P8, female)*

A sense of powerlessness combined with acceptance was perceived to have impacted the profession as a whole:

*I think erm you know everyone's a bit more sort of resigned to things now and it feels like we've sort of erm entered a collective sort of depressive state of acceptance. (P9, male)*

We can see that these personal, emotion-based coping strategies had their limits when employed during the COVID-19 pandemic.

1  
2  
3 Problem-focused strategies were perhaps more effective. One participant volunteered to  
4 take on the work of calling relatives to let them know their loved ones were very sick,  
5 perhaps to be able to provide a more personal input to such a traumatic situation.  
6  
7  
8  
9

10 *I used to volunteer to kind of be the person making those phone calls, cos it was, it felt*  
11 *like you were able to do something about it at least? It wasn't that sort of like, "I put*  
12 *lines in people and hopefully", and then just watching them die. (P5, female)*  
13  
14  
15  
16

17  
18 Another participant agentically took control of her situation by arranging more support for  
19 herself, perhaps in response to the helplessness described in the previous theme:  
20  
21

22  
23 *...when lockdown came back in [...] I noticed that like I was feeling low so I referred*  
24 *myself to the Let's Talk Wellbeing, erm which is like the community, CBT, GP, self-*  
25 *referral system. And I found that really helpful erm so that kind of stopped me*  
26 *spiralling. (P10, female)*  
27  
28  
29  
30  
31

### 32 33 *Organisational strategies* 34 35 36

37 Just as participants found ways to cope with the challenges of COVID-19, so did the  
38 organisations and teams for whom they worked, with some trusts and teams demonstrating  
39 collaborative, flexible thinking One participant reported flexibility in terms of working from  
40 home for colleagues who had to self-isolate:  
41  
42  
43  
44

45  
46 *...most of the places have let the person sort of choose whether they you know, if it's*  
47 *your child that's got a fever and actually you know you're isolating and could do things*  
48 *then that's fine. But if you're poorly then you're poorly and that's fine. (P11, female)*  
49  
50  
51  
52

53 Another described the need for her team to make pragmatic decisions about how to treat  
54 COVID-19 patients:  
55  
56  
57  
58  
59  
60

1  
2  
3 *So if someone was clearly dying, they would [pause] be stepped down to a normal*  
4 *ward because on a normal ward they could at least have a visitor for one hour a day.*  
5  
6  
7 *(P14, female)*  
8  
9

10 A third participant reported that her team pulled together to help one another in the new  
11 circumstances:  
12  
13

14  
15  
16 *...there'd be so many [emails] even coming in during our shift, we'd divide it up, so*  
17 *we'd say, "you read these five, I'll read these five, you read these five, and then I'll read*  
18 *these five", and then we'd kind of share what we've learned from them. (P5, female)*  
19  
20  
21  
22

### 23 Positive impact of COVID-19 on working practices

24

25  
26  
27 Participants reported that working as junior doctors during the COVID-19 pandemic had  
28 some positive impacts. These included new and less bureaucratic ways of working as well as  
29 additional support and camaraderie.  
30  
31  
32

### 33 *Positive new ways of working*

34

35  
36  
37 Positive changes revolved around a less bureaucratic way of working, which included  
38 consistent teams, longer rotations and less red tape.  
39  
40  
41  
42

43  
44 Several participants reported that they were now working in a consistent team, rather than  
45 regularly working with new colleagues. This was experienced as positive:  
46  
47  
48

49  
50 *So normally, you're kind of working with somebody new every day almost. But we*  
51 *worked in teams that didn't rotate, so you had [...] this team that you worked with very*  
52 *intensely for those four months as well, and that support structure was really good.*  
53  
54  
55 *(P5, female)*  
56  
57  
58  
59  
60

1  
2  
3 *...we got really to know each other, we had a little social WhatsApp group where we'd,*  
4 *like, post pictures of the cakes we were gonna bring in, you know, everyone bought in*  
5 *food. We almost looked forward to going to work because you were like, oh, my*  
6 *buddies are there. (P8, female)*  
7  
8  
9

10  
11  
12 A sense of being part of a team and able to enjoy work comes across in the above quote,  
13 where cake and conversation bring some positivity to the bleak picture painted thus far.  
14  
15

16  
17  
18 Rotations were paused for many junior doctors. Although this could lead to uncertainty, as  
19 reported in an earlier theme, it also had some potentially positive impacts:  
20  
21

22  
23 *So we were on the first rotation for four months and then the second for eight months*  
24 *[...] Um, so, I guess it would have depended on what ward you got stuck on?*  
25 *[interviewer laughs] Um, I got stuck on one of the nice placements, I really enjoyed*  
26 *myself on the ward. (P3, female)*  
27  
28  
29

30  
31  
32 Various practical changes to working patterns were also experienced as positive. These  
33 included simple factors such as the ability to work from home and reduced red tape:  
34  
35

36  
37  
38 *...just get away and do something relaxing, even if it's just go for a walk around the*  
39 *local canal and come back on a lunchtime is so much more achievable when you're*  
40 *working from home. So I think that's been really good. (P2, female)*  
41  
42  
43

44  
45 *...they say oh, we want you to travel to a hospital on your day off to show us your*  
46 *passport and your GMC certificate. And it's like I've been – doing this for 10 years. I've*  
47 *worked for you six times! Like, you've got my details [both laugh]. And that's one thing*  
48 *where COVID has been really good because now they do it online and I'm like, why*  
49 *couldn't you have always done this? (P8, female)*  
50  
51  
52  
53  
54

55  
56 One participant even appeared to cite COVID-19 as a motivator for returning to work at the  
57 NHS after time in another career:  
58  
59  
60

1  
2  
3 *...then COVID came and I wanted to come back to medicine anyway so I thought okay*  
4 *fine then let's just crack on with erm with the NHS. (P15, female)*  
5  
6  
7  
8  
9

### 10 *Additional support and camaraderie*

11  
12  
13

14 Some participants reported that new supportive measures, such as additional facilities, had  
15 been put in place by their workplaces:  
16  
17

18  
19  
20 *...they provided hot meals, which, at the beginning, when there were huge queues at*  
21 *the supermarket, and we were working 12-hour shifts, five days a week, and, um,*  
22 *[pause] and it was unpredictable whether you could kind of get food, because there*  
23 *were a lot of shortages and things. (P5, female)*  
24  
25  
26  
27

28  
29 *And since COVID, things have improved slightly, there's, um we have something called*  
30 *like the rest and recuperation hub, which is like a room erm that does free teas and*  
31 *coffees and a few snacks [...] you go there on your breaks to relax. (P6, female)*  
32  
33  
34  
35

36 Another participant reported that her hospital made an effort to offer junior doctors  
37 support, although this was against the backdrop of a toxic working environment:  
38  
39

40  
41 *I'd say the culture's getting worse except for the fact that they send an e-mail out*  
42 *every now and again with some contact numbers [for support services] and that's*  
43 *what COVID has done. (P1, female)*  
44  
45  
46  
47  
48

49 It should be noted that the reports of improved support were tempered – note that  
50 participants reported 'slight' improvements to a culture that was also 'getting worse'.  
51  
52  
53

### 54 Discussion

55  
56  
57

58 Fifteen distressed junior doctors were interviewed between December 2020 and February  
59 2021 about their perceptions of stress and distress in their workplace cultures. All  
60

1  
2  
3 participants discussed how COVID-19 impacted their experiences. Looking at our themes as  
4 a gestalt, we suggest that the helplessness that arose due to the trauma of working during  
5 the pandemic meant that individual coping strategies which may have been more beneficial  
6 during less unusual times fell short, something that often went unrecognised by employers.  
7 To compound this, participants were also not sufficiently supported either practically or  
8 psychologically during this time. This may have led to feeling powerless and resigned in the  
9 face of difficult circumstances for which they were unprepared. Additionally, we  
10 recommend that the positive lessons highlighted in this paper are followed in the long term.  
11  
12  
13  
14  
15  
16  
17  
18  
19

20 Helplessness was commonly reported whilst working during COVID-19. Specifically, one  
21 participant described how traumatic it was to see so many patients dying. Others [8, 10, 27]  
22 have cited grief and managing such large numbers of patient deaths as especially  
23 challenging. We suggest that newer junior doctors might need extra support to process grief  
24 in such exceptional circumstances, for which they had not been trained. This might  
25 especially be the case for younger doctors [28] and female doctors [29, 1] since it has been  
26 shown that these groups, who made up the majority of participants in the current study, are  
27 potentially more vulnerable to depression, stress and suicidal thoughts.  
28  
29  
30  
31  
32  
33  
34  
35

36 Another participant reported an experience of moral injury following the unsafe behaviour  
37 of other staff members. Moral injury due to redeployment away from long-term patients  
38 [15] and concerns about letting patients down [8] during COVID-19 has also been reported.  
39 Our findings add an additional perspective, demonstrating that moral injury can also arise  
40 due to staff members neglecting safety protocols.  
41  
42  
43  
44  
45  
46

47 Adding to these traumatic personal experiences, participants reported that while their  
48 workload rose, staffing levels often decreased. Previous research has shown that, following  
49 austerity [30], UK HCPs were already working in an under-resourced environment and that  
50 additional workload is a potent stressor [21, 31-33]. Crises such as COVID-19 further  
51 emphasise the need for extra resources for our healthcare system, echoing the  
52 recommendations of the 2009 Boorman report [34], which have been widely neglected [6].  
53 It is often harder for frontline workers to take breaks during a pandemic [5, 10], adding to  
54 the potential for burnout since longer working hours are a risk factor [29]. Cubitt and  
55  
56  
57  
58  
59  
60



1  
2  
3 colleagues [5] have highlighted the need for rotas that enable well-being rather than merely  
4 being resilient; that is, containing the bare minimum number of doctors per shift.

5  
6  
7 Qualitative research such as the current study adds depth to these recommendations by  
8 demonstrating the instability, lack of support and powerlessness that distressed HCPs faced  
9 during this time.  
10  
11  
12

13  
14 Participants felt unsupported whilst working in these new, traumatic circumstances, a  
15 finding reflected elsewhere [7, 10, 11]. For example, one participant who needed  
16 psychological support intimated that she felt invisible. Whilst the needs of others – nurses  
17 and non-medical staff – were considered, her needs were assumed not to exist,  
18 demonstrating the powerlessness of the junior doctors in this situation. If you cannot be  
19 seen, you cannot be helped.  
20  
21  
22  
23  
24  
25

26  
27 The need for extra training and support for junior doctors during pandemics has been  
28 reported [15]. We echo this recommendation and would add that support could come from  
29 good leadership which recognises the challenges staff face, a feeling of being valued within  
30 a team and by addressing the practical and physical limitations junior doctors frequently  
31 experience, such as poor 'on call' accommodation and access to regular meals. We suggest  
32 that employers often fail to recognise the limitations of individual coping strategies, both  
33 during crises such as the pandemic and in less unusual times.  
34  
35  
36  
37  
38  
39  
40

41 Participants used various strategies to attempt to cope with working during COVID-19.  
42 Emotion-focused strategies such as crying were reported in our study although these  
43 strategies often appeared limited in usefulness. At times, the stoicism reported by  
44 participants in the current study verged on learned helplessness, demonstrating that  
45 personal coping strategies alone are not enough, and that coping is not guaranteed in a  
46 healthcare crisis when doctors are already stressed and distressed. Various individualised  
47 coping strategies have been suggested, including healthy eating, attending training, going to  
48 therapy, support networks [6] and making use of 'wobble rooms' [15]. However, San Juan  
49 and colleagues [6] recognised that finding time for these activities might be difficult,  
50 particularly during a time of crisis.  
51  
52  
53  
54  
55  
56  
57  
58  
59  
60

1  
2  
3 Owens et al. [30] state that if we are continually asking our HCPs to behave heroically in  
4 exceptional circumstances, we are inviting burnout. Indeed, it could be posited that  
5 encouraging such strategies places the responsibility for managing the unmanageable with  
6 individuals, rather than the system [6]. It is argued that, in our neo-liberal culture,  
7 responsibility for wellbeing is often placed on the individual, exonerating the state and  
8 systems for the wellbeing of workers [30, 35, 36]. This can be seen in the use of the term  
9 'resilience', which places responsibility for managing the unmanageable on the shoulders of  
10 individuals, rather than organisations [35, 36]. Therefore, in line with San Juan et al. [6], we  
11 recommend a focus on organisational, rather than the personal, coping strategies. Those  
12 organisational strategies could, as seen in our findings include flexibility and better  
13 organisational, managerial and peer-support through teamwork and collaboration as well as  
14 addressing the practical workplace issues which could lead to HCPs feeling physically safe  
15 and cared for. Vulnerable junior doctors need organisational support especially, although  
16 not exclusively, during crises like COVID-19. However, the emphasis continues to be on the  
17 individual [37, 38].  
18  
19  
20  
21  
22  
23  
24  
25  
26  
27  
28  
29  
30  
31

32 Participants reported several potentially positive impacts of working during the pandemic, a  
33 novel finding. These included working in more consistent teams. San Juan and colleagues [6]  
34 have similarly reported that consistent teams are helpful for HCP, while inconsistent teams  
35 make it harder for junior doctors to seek support [14], increasing stress and vulnerability to  
36 mental ill-health [21]. As such, we recommend that, where possible, policymakers consider  
37 the use of consistent teams for junior doctors going forward. The beneficial impact of a  
38 reduction in bureaucracy reported by one participant appears to be another novel finding.  
39 We would suggest any such reductions should be maintained after the pandemic ends, with  
40 a potential reduction in time pressures for junior – and senior – doctors as well as other  
41 healthcare workers.  
42  
43  
44  
45  
46  
47  
48  
49  
50  
51

52 Participants stated that some new supportive measures, such as rest hubs, had been put  
53 into place during COVID-19. Such spaces have been deemed helpful by other researchers [7,  
54 10, 15], although there are anecdotal reports that many of these spaces have now been  
55 closed as hospitalisations from COVID-19 reduce. In contrast, HCPs in other studies have  
56  
57  
58  
59  
60

1  
2  
3 reported that the extra strain on the system meant that there were fewer places than usual  
4 to shower, rest or relax with colleagues [5, 6].  
5  
6  
7

8  
9 In line with our findings, Vindrola-Padros et al. [7] reported that there was extra signposting  
10 towards support during COVID-19; however, there was not often time to engage with this  
11 support. Additionally, it has been anecdotally reported that much of this support has been  
12 withdrawn now. This adds further weight to the notion that systemic, holistic changes are  
13 needed to support NHS staff, rather than focusing the responsibility for change on  
14 individuals [6]. We suggest that such limited responses from employers may have  
15 contributed to the feelings of resignation described by some of our participants.  
16  
17  
18  
19  
20  
21  
22

### 23 Limitations

24  
25 This study has various strengths, including being the first qualitative paper (to our  
26 knowledge) to explore the experiences of junior doctors during COVID-19. Our data was  
27 collected during the pandemic and we utilised in-depth, collaborative thematic analysis.  
28  
29 However, despite these strengths, the paper has several limitations. We did not recruit  
30 these participants specifically to talk about the Covid-19 pandemic. Rather, the timing of the  
31 study meant that the topic arose naturally. As such, the interview guide could have been  
32 designed to ask participants more thoroughly about these experiences. Additionally, some  
33 of the junior doctors had more experience of working with COVID-19 patients than others,  
34 meaning some participants are better represented in this paper than others. Further, there  
35 is a notable gender disparity, with a higher proportion of female doctors taking part. More  
36 female (n=12) participants volunteered than males (n=3). The increased willingness of  
37 female participants to speak about their experiences may be associated with evidence  
38 indicating that female doctors are more likely to experience distress. Sadly, this group are  
39 also more likely to kill themselves [1]. The higher proportion of female participants may also  
40 reflect gendered help-seeking behaviour for mental ill-health, evidenced in the wider  
41 population [38], as well as the fact that female doctors are more likely to take part in  
42 research than their male counterparts [39]. Finally, it should be reiterated that this was a  
43 purposive sample of particularly distressed junior doctors, albeit taken from a wider sample  
44  
45  
46  
47  
48  
49  
50  
51  
52  
53  
54  
55  
56  
57  
58  
59  
60

1  
2  
3 in which distress was widely reported, and so our findings are not intended to be  
4 generalised to all junior doctors.  
5  
6  
7

## 8 9 **Conclusions and recommendations**

10 We conclude that junior doctors working during the COVID-19 pandemic faced multiple  
11 stressors and used various coping mechanisms to deal with these, with greater or lesser  
12 degrees of success. Several unexpected benefits of this period arose, including new ways of  
13 working and additional support and camaraderie. We believe that the responsibility for  
14 alleviating the stress and distress of junior doctors working during times of stress lies with  
15 organisational employment issues and systemic workforce gaps, rather than with  
16 individuals. As such, we recommend system-wide changes, such as improved  
17 communication strategies, increased flexibility around home-based working, addressing the  
18 physical limitations of the working conditions many junior doctors experience and more  
19 supportive and compassionate leadership. Additionally, we suggest that, where possible,  
20 junior doctors are assigned to consistent teams, with the opportunity for appropriate  
21 psychological support where indicated.  
22  
23  
24  
25  
26  
27  
28  
29  
30  
31  
32  
33

34 **Author contributions:** RR, JS, CCG, MB, AD, KT, AG, AT, MvH, LA, JM – substantial  
35 contributions to conception and design; approval of final version to the published.  
36  
37  
38

39  
40 RR, JS, CCG, MB, AT, KT, AD, AT – acquisition, analysis or interpretation of data; drafting the  
41 article or revising it critically for important intellectual content.  
42  
43  
44

45 **Acknowledgements:** The authors would like to thank all junior doctor participants who  
46 kindly gave their time to share their experiences of working in the NHS. We also wish to  
47 thank members of the PPIE group who provided valuable input throughout the study.  
48  
49  
50  
51

52  
53 **Data sharing:** This study has not received ethical approval to share confidential data with  
54 any third party other than the research team.  
55  
56  
57  
58  
59  
60

1  
2  
3  
4  
5  
6  
7  
8  
9  
10  
11  
12  
13  
14  
15  
16  
17  
18  
19  
20  
21  
22  
23  
24  
25  
26  
27  
28  
29  
30  
31  
32  
33  
34  
35  
36  
37  
38  
39  
40  
41  
42  
43  
44  
45  
46  
47  
48  
49  
50  
51  
52  
53  
54  
55  
56  
57  
58  
59  
60

**Ethical approval:** Ethical approval was granted by the University of Birmingham and Health Research Authority (reference number: 19/HRA/6579)

For peer review only

## References

1. Dutheil, F., et al. *Suicide among physicians and health-care workers: A systematic review and meta-analysis*. PloS one. 2019. **14**(12): p. e0226361
2. Petrie, K., et al. *Interventions to reduce symptoms of common mental disorders and suicidal ideation in physicians: A systematic review and meta-analysis*. The Lancet Psychiatry. 2019. **6**(3): 225-34.
3. Brooks, S. K., et al. *Review of literature on the mental health of doctors: Are specialist services needed?* Journal of Mental Health. 2011. **20**(2): 146-56.
4. Chopra, S. S. et al. *Physician Burnout*. JAMA. 2004. **291**(5): 633–33.
5. Cubitt, L. J. et al. *Beyond PPE: A mixed qualitative-quantitative study capturing the wider issues affecting doctors' well-being during the COVID-19 pandemic*. BMJ Open. 2021. **11**(3): e050223.
6. San Juan, N. V., et al. *Healthcare Workers' mental health and wellbeing during the COVID-19 pandemic in the UK: Contrasting guidelines with experiences in practice*. MedRxiv. 2020; advanced online.
7. Vindrola-Padros C., et al. *Perceptions and experiences of healthcare workers during the COVID-19 pandemic in the UK*. BMJ Open. 2020; **10**(11): Advanced online: e040503.
8. Liberati E., et al. *A qualitative study of experiences of NHS mental healthcare workers during the Covid-19 pandemic*. BMC Psychiatry. 2021. **21**(1): 1-12.
9. Sun, N., et al. *A qualitative study on the psychological experience of caregivers of COVID-19 patients*. American Journal of Infection Control. 2020. **48**(6): 592-8.
10. Blake, H., et al. *COVID-well study: Qualitative evaluation of supported wellbeing centres and psychological first aid for healthcare workers during the COVID-19 pandemic*. International Journal of Environmental Research and Public Health. 2021. **18**(7): 3626-59.
11. Newman K. L., et al. *Experiences and emotional strain of NHS frontline workers during the peak of the COVID-19 pandemic*. International Journal of Social Psychiatry. 2021; advanced online 00207640211006153.
12. Cawcutt K. A., et al. *Fighting fear in healthcare workers during the COVID-19 pandemic*. Infection Control & Hospital Epidemiology. 2020. **41**(10): 1192-3.
13. BMA, <https://www.bma.org.uk/advice-and-support/international-doctors/life-and-work-in-the-uk/toolkit-for-doctors-new-to-the-uk/doctors-titles-explained>. 2020.

14. Fox F. E., et al. *Junior doctors' experiences of personal illness: A qualitative study*. Medical Education. 2011. **45**(12): 1251-61.
15. Coughlan C., et al. *COVID-19: Lessons for junior doctors redeployed to critical care*. Postgraduate Medical Journal. 2021. **97**(1145): 188-91.
16. Lion P., et al. *ENT trainees' experience of redeployment during the coronavirus disease 2019 pandemic: A qualitative study*. The Journal of Laryngology & Otology, 2021. 1-13.
17. Aziz, A., et al. *Rapid transformation of the medical on-call rotas to deal with the COVID-19 pandemic: A case study*. Future Healthcare Journal. 2021; **8**(1): e36.
18. Seifman M. A., et al. *COVID-19 impact on junior doctor education and training: A scoping review*. Postgraduate medical journal. 2021.
19. Rimmer, M. P., et al. *Provision of obstetrics and gynaecology services during the COVID-19 pandemic: A survey of junior doctors in the UK National Health Service*. BJOG: An International Journal of Obstetrics & Gynaecology. 2020. **127**(9): 1123-8.
20. Riley, R., et al. *Protective factors and sources of support in the workplace as experienced by UK foundation and junior doctors: A qualitative study*. BMJ Open. 2021. **11**(6): e045588.
21. Riley, R., et al. *Sources of work-related psychological distress experienced by UK-wide foundation and junior doctors: A qualitative study*. BMJ Open. 2021. **11**(6): e043521.
22. Osman, A., et al. *The depression anxiety stress scales—21 [DASS-21]: Further examination of dimensions, scale reliability, and correlates*. Journal of clinical psychology. 2012. **68**(12): 1322–1338.
23. Paykel, E. S., et al. *Suicidal feelings in the general population: A prevalence study*. The British Journal of Psychiatry. 1974. **214**(582): 460–9.
24. King N. and C. Horrocks, *Interviews in Qualitative Research*. 2010, London: Sage.
25. Braun V. and V. Clarke, *Using thematic analysis in psychology*. Qualitative research in psychology, 2006. **3**(2): 77-101.
26. Braun V. and V. Clarke, *Reflecting on reflexive thematic analysis*. Qualitative Research in Sport, Exercise and Health, 2019. **11**(4): 589-97.
27. Johnson, S., et al. *Impact on mental health care and on mental health service users of the COVID-19 pandemic: A mixed methods survey of UK mental health care staff*. Social Psychiatry and Psychiatric Epidemiology, 2021. **56**(1): 25-37.

- 1  
2  
3 28. Kinman G. and K. Teoh K, *What could make a difference to the mental health of UK*  
4 *doctors? A review of the research evidence*. 2018.  
5  
6  
7 29. Kinman, G., et al. *The mental health and wellbeing of nurses and midwives in the*  
8 *United Kingdom*. Royal College of Nursing Foundation and the Society for Occupational  
9 Medicine, 2020.  
10  
11  
12 30. Oliver, D., *The NHS's understaffing is its Achilles' heel*. BMJ: British Medical Journal  
13 (Online), 2017. 357.  
14  
15  
16 31. Boorman, S. *NHS Health and well-being review: Interim report*. NHS Health and  
17 Wellbeing Review, 2009.  
18  
19  
20 32. Amofo, E., et al. *What are the significant factors associated with burnout in*  
21 *doctors?* Occupational Medicine, 2015; **65**(2): 117-21.  
22  
23  
24 33. Pollock, A., et al. *Interventions to support the resilience and mental health of*  
25 *frontline health and social care professionals during and after a disease outbreak, epidemic*  
26 *or pandemic: A mixed methods systematic review*. Cochrane Database of Systematic  
27 Reviews, 2020. 11.  
28  
29  
30 34. Sood, A., et al. *Stress management and resilience training among department of*  
31 *medicine faculty: A pilot randomized clinical trial*. Journal of general internal medicine, 2011.  
32 **26**(8): 858-61.  
33  
34  
35 35. Royal College of Surgeons of Edinburgh,  
36 <https://committees.parliament.uk/writtenevidence/11033/html/>, 2020.  
37  
38  
39 36. Joseph, J., *Resilience as embedded neoliberalism: A governmentality approach*.  
40 Resilience, 2013. **1**(1): 38-52.  
41  
42  
43 37. Traynor, M. *Guest editorial: What's wrong with resilience*. Journal of Research in  
44 Nursing, 2018. **23**(1): 5-8.  
45  
46  
47 38. Seidler, Z. E., et al. *The role of masculinity in men's help-seeking for depression: A*  
48 *systematic review*. Clinical Psychology Review, 2016. **49**: 106-18.  
49  
50  
51 39. Cull, W. L., et al. *Response rates and response bias for 50 surveys of pediatricians*.  
52 Health Services Research, 2005. **40**(1): 213-26.  
53  
54  
55  
56  
57  
58  
59  
60



Consolidated criteria for reporting qualitative studies [COREQ]:

Developed from: Tong, A., Sainsbury, P., & Craig, J. [2007]. Consolidated criteria for reporting qualitative research [COREQ]: a 32-item checklist for interviews and focus groups. *International journal for quality in health care*, 19[6], 349-357.

| No. Item                                       | Guide questions/description                                                                                                                              | Reported on page # |
|------------------------------------------------|----------------------------------------------------------------------------------------------------------------------------------------------------------|--------------------|
| <b>Domain 1: Research team and reflexivity</b> |                                                                                                                                                          |                    |
| <i>Personal characteristics</i>                |                                                                                                                                                          |                    |
| 1. Interviewer/facilitator                     | Which author/s conducted the interview or focus group?                                                                                                   | Page 11            |
| 2. Credentials                                 | What were the researcher's credentials? E.g. PhD, MD.                                                                                                    | Page 11            |
| 3. Occupation                                  | What was their occupation at the time of the study?                                                                                                      | Page 11            |
| 4. Gender                                      | Was the researcher male or female?                                                                                                                       | Page 11            |
| 5. Experience and training                     | What experience or training did the researcher have?                                                                                                     | Page 11            |
| <i>Relationship with participants</i>          |                                                                                                                                                          |                    |
| 6. Relationship established                    | Was a relationship established prior to study commencement?                                                                                              | Page 11            |
| 7. Participant knowledge of interviewer        | What did the participant know about the researcher? E.g. personal goals, reasons for doing the research.                                                 | Page 11            |
| 8. Interviewer characteristics                 | What characteristics were reported about the interviewer/facilitator? E.g. bias, assumptions, reasons and interests in the research topic                | Page 12            |
| <b>Domain 2: study design</b>                  |                                                                                                                                                          |                    |
| <i>Theoretical framework</i>                   |                                                                                                                                                          |                    |
| 9. Methodological orientation and theory       | What methodological orientation was stated to underpin the study? E.g. grounded theory, discourse analysis, ethnography, phenomenology, content analysis | Page 12            |

|                                        |                                                                                    |                              |
|----------------------------------------|------------------------------------------------------------------------------------|------------------------------|
| <i>Participant sampling</i>            |                                                                                    |                              |
| 10. Sampling                           | How were participants selected? E.g. purposive, convenience, consecutive, snowball | Page 10                      |
| 11. Method of approach                 | How were participants approached? E.g. face-to-face, telephone, mail, email        | Page 10                      |
| 12. Sample size                        | How many participants were in the study?                                           | Page 11                      |
| 13. Non-participation                  | How many people refused to participate or dropped out? Reasons?                    | None                         |
| <i>Setting</i>                         |                                                                                    |                              |
| 14. Setting of data collection         | Where was the data collected? E.g. home, clinic, workplace                         | Page 11                      |
| 15. Presence of non-participants       | Was anyone else present besides the participants and the researchers?              | No                           |
| 16. Description of the sample          | What were the important characteristics of the sample? E.g. demographic data, date | Page 11                      |
| <i>Data collection</i>                 |                                                                                    |                              |
| 17. Interview guide                    | Were questions, prompts, guides provided by the authors? Was it pilot tested?      | Page 11                      |
| 18. Repeat interviews                  | Were repeat interviews carried out? If yes, how many?                              | No                           |
| 19. Audio/visual recording             | Did the research use audio or visual recording to collect the data?                | Page 11                      |
| 20. Field notes                        | Were field notes made during and/or after the interview or focus group?            | Page 11                      |
| 21. Duration                           | What was the duration of the interviews or focus group?                            | Page 11                      |
| 22. Data saturation                    | Was data saturation discussed?                                                     | Page 12                      |
| 23. Transcripts returned               | Were transcripts return to participants for comment and/or correction?             | No, due to lack of resources |
| <b>Domain 3: analysis and findings</b> |                                                                                    |                              |
| <i>Data analysis</i>                   |                                                                                    |                              |
| 24. Number of data coders              | How many data coders coded the data?                                               | Page 12                      |
| 25. Description of the coding tree     | Did authors provide a description of the coding tree?                              | No                           |
| 26. Derivation of themes               | Derived from the data?                                                             | Page 12                      |

|                                  |                                                                                                                                 |                              |
|----------------------------------|---------------------------------------------------------------------------------------------------------------------------------|------------------------------|
| 27. Software                     | What software, if applicable, was used to manage the data?                                                                      | Page 12                      |
| 28. Participant checking         | Did participants provide feedback on the findings?                                                                              | No, due to lack of resources |
| <i>Reporting</i>                 |                                                                                                                                 |                              |
| 29. Quotations presented         | Were participant quotations presented to illustrate the themes/findings? Was each quotation identified? E.g. participant number | Pages 13-22                  |
| 30. Data and findings consistent | Was there consistency between the data presented and the findings                                                               | Yes, see sages 13-22         |
| 31. Clarity of major themes      | Were major themes presented in the findings?                                                                                    | Yes                          |
| 32. Clarity of minor themes      | Is there a description of diverse cases or discussion of minor themes?                                                          | Yes                          |
